# Supplementary material for: Long Non-Coding RNA Profiling in a Non-Alcoholic Fatty Liver Disease Rodent Model: New Insight into Pathogenesis
Source: MDPI journal article supplement (doi:10.3390/ijms18010021), 2017-01-16
Supplement: s1 [file s1]

# Supplementary Materials: Long Non-Coding RNA Profiling in a Non-Alcoholic Fatty Liver Disease Rodent Model: New Insight into Pathogenesis

Yi Chen, Haixiu Huang, Chengfu Xu, Chaohui Yu and Youming Li

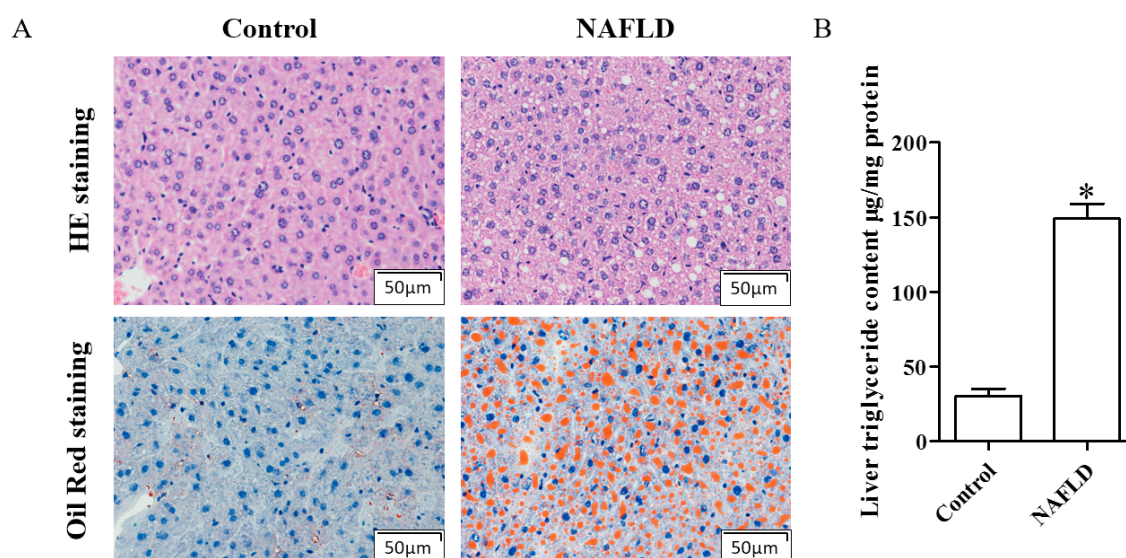

**Figure S1.** Pathological changes of an NAFLD rodent model. (A) Hematoxylin–eosin (HE) staining and Oil Red staining of NAFLD mice liver. Scale bar: 50 μm; (B) Liver triglyceride content of NAFLD and control mice. Data are presented as the mean ± SD. \*  $p < 0.001$ .

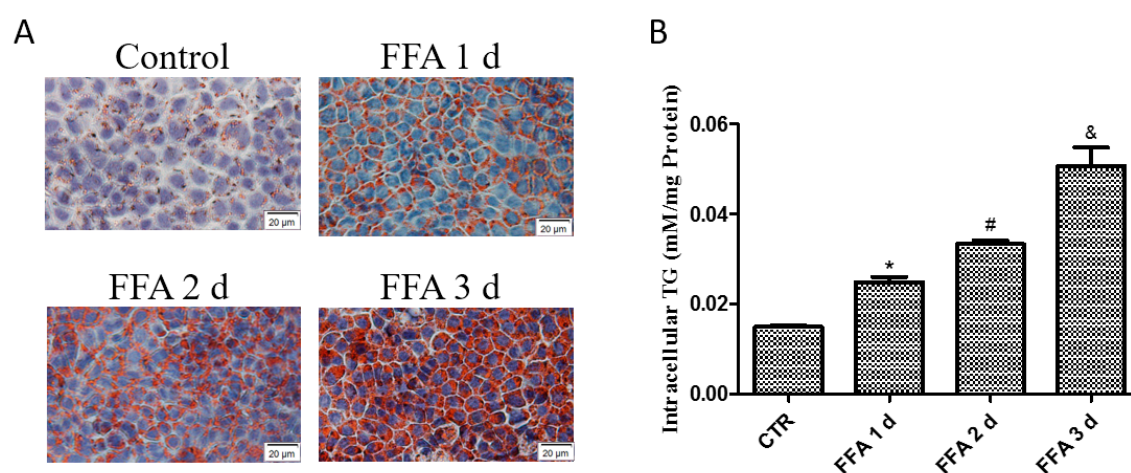

**Figure S2.** Pathological changes of an NAFLD cellular model. (A) Oil Red staining of FFA-treated AML12 cells, at 1 day (d), 2 days, 3 days. Scale bar: 20 μm; (B) Intracellular TG content of NAFLD cells and control. Data are presented as the mean ± SD. \*  $p < 0.001$ , compared with control group; #  $p < 0.001$ , compared with FFA 1d group; &  $p < 0.001$ , compared with the FFA 2d group.

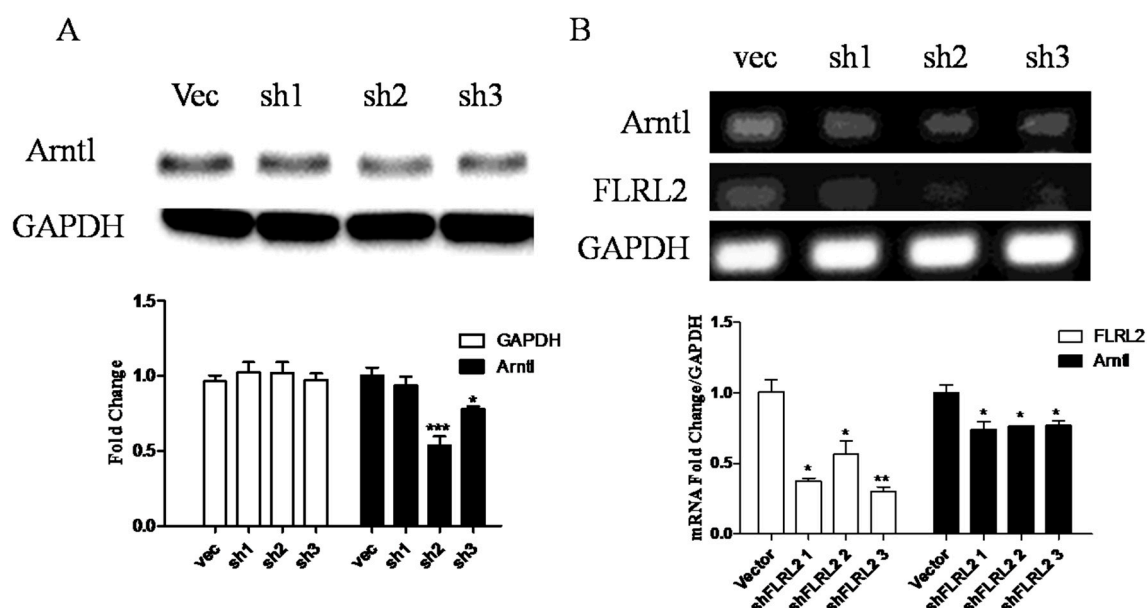

**Figure S3.** Knockdown of FLRL2 downregulated predicted target *Arntl* expression. Three shFLRL2 plasmids (sh1–3) or an empty vector as a control were transfected in AML12 cells for 48 h. Cell extracts were prepared for Western blot (A) and qPCR (B). mRNA levels of FLRL2 and *Arntl* were measured by qPCR, normalized to GAPDH and presented as the mean  $\pm$  SD relative to the levels of control cells from three experiments. \*  $p < 0.05$ , \*\*  $p < 0.01$ , \*\*\*  $p < 0.001$ .

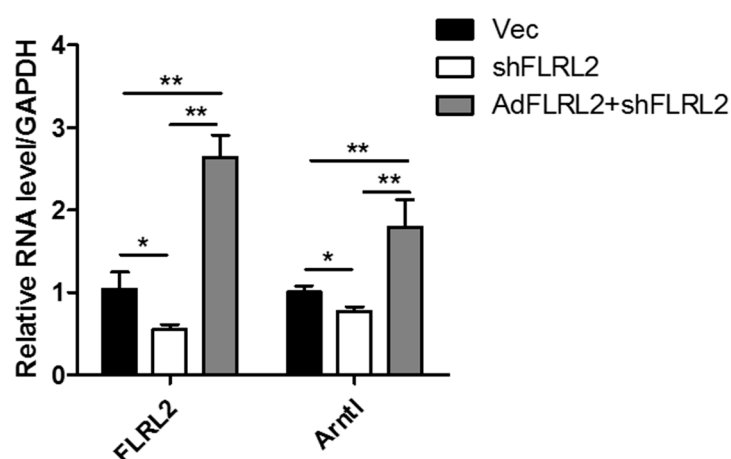

**Figure S4.** Rescue experiment of FLRL2 knockdown. The plasmids shFLRL2 and (modified) AdFLRL2, or an empty vector as a control were transfected in AML12 cells for 48 h. Cell extracts were prepared for qPCR. mRNA levels of FLRL2 and *Arntl* were measured by qPCR and presented as the mean  $\pm$  SD relative to the levels of control cells from three experiments, normalized to GAPDH. \*  $p < 0.05$ , \*\*  $p < 0.01$ .

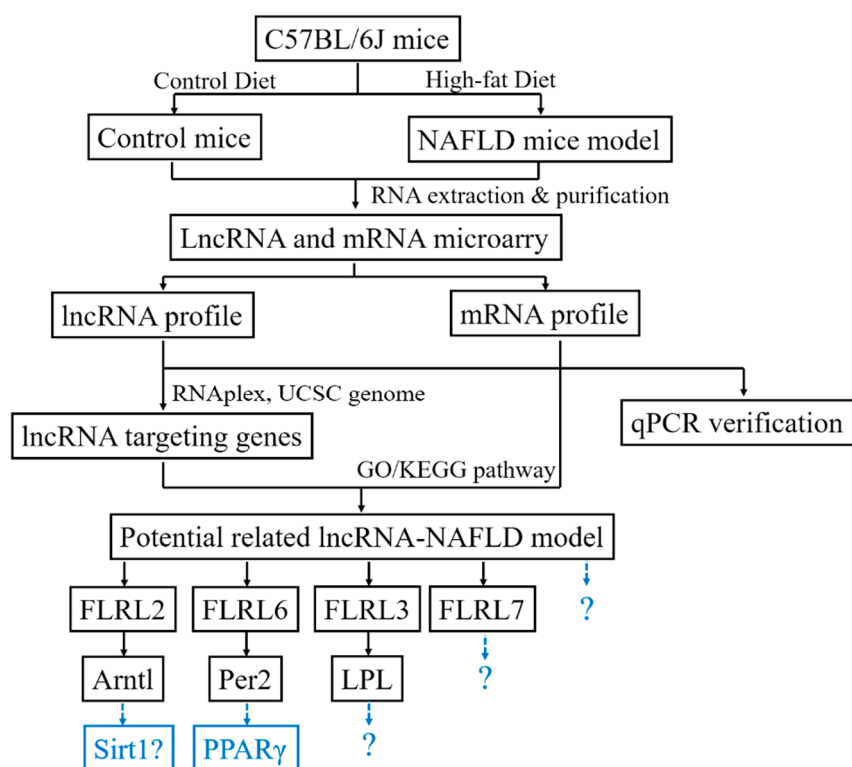

**Figure S5.** Flowchart of the experimental design.

**Table S1.** Information of deregulated lncRNAs by microarray analysis.

| Probe Name             | p-Value | Fold Change | Sequence Name             | LncRNA Source       | LncRNA Acession No-           | LncRNA Location               |
|------------------------|---------|-------------|---------------------------|---------------------|-------------------------------|-------------------------------|
| CUST_16222_PI428753551 | 0.004   | 11.00       | seq5729-3                 | Fantom3.0           | ri 5330405H16 PX00053O21 3487 | chr4: 151033075-151036561; -  |
| CUST_20609_PI428753551 | 0.012   | 8.46        | seq7258-1                 | Fantom3.0           | ri 6430539F13 PX00648F05 1615 | Unknown                       |
| CUST_85433_PI428753551 | 0.000   | 7.74        | seq29857-3                | UCSC                | uc007eim.1                    | chr10: 7780267-7781356; +     |
| CUST_50555_PI428753551 | 0.019   | 6.79        | seq17750-1                | Fantom3.0           | ri C130011B08 PX00666E11 1381 | chr4: 151042408-151043788; -  |
| CUST_50556_PI428753551 | 0.011   | 6.11        | seq17750-2                | Fantom3.0           | ri C130011B08 PX00666E11 1381 | chr4: 151042408-151043788; -  |
| CUST_8232_PI428753551  | 0.012   | 5.63        | seq2913-3                 | Fantom3.0           | ri 2810049O06 ZX00065N17 968  | chr4: 151003656- 151004624; - |
| CUST_84983_PI428753551 | 0.012   | 5.06        | seq29706-1                | UCSC                | uc011wph.1                    | chr1: 91415981-91459328; -    |
| CUST_45020_PI428753551 | 0.022   | 4.66        | seq15816-1                | Fantom3.0           | ri B020030O10 PX00326D23 1416 | Unknown                       |
| CUST_85431_PI428753551 | 0.001   | 4.41        | seq29857-1                | UCSC                | uc007eim.1                    | chr10: 7780267-7781356; +     |
| CUST_49093_PI428753551 | 0.008   | 4.36        | seq17238-2                | Fantom3.0           | ri B930060P07 PX00164N22 2100 | Unknown                       |
| A_30_P01024486         | 0.045   | 4.10        | chr3:58118325-58136550_R  | Aglient G3 8 × 60 K | Unknown                       | chr3: 58118325-58136550; -    |
| CUST_8230_PI428753551  | 0.020   | 3.95        | seq2913-1                 | Fantom3.0           | ri 2810049O06 ZX00065N17 968  | chr4: 151003656-151004624; -  |
| CUST_20611_PI428753551 | 0.016   | 3.94        | seq7258-3                 | Fantom3.0           | ri 6430539F13 PX00648F05 1615 | Unknown                       |
| CUST_54276_PI428753551 | 0.029   | 3.87        | seq19027-3                | Fantom3.0           | ri C230071P09 PX00176O09 1184 | chr1: 51148308-51149493; +    |
| CUST_8231_PI428753551  | 0.024   | 3.78        | seq2913-2                 | Fantom3.0           | ri 2810049O06 ZX00065N17 968  | chr4: 151003656-151004624; -  |
| CUST_84984_PI428753551 | 0.018   | 3.67        | seq29706-2                | UCSC                | uc011wph.1                    | chr1: 91415981-91459328; -    |
| CUST_6122_PI428753551  | 0.013   | 3.60        | seq2165-3                 | Fantom3.0           | ri 1810044K17 ZX00081G24 538  | chr16: 93368238-93369029; +   |
| CUST_86955_PI428753551 | 0.003   | 3.55        | seq30374-2                | UCSC                | uc007oqy.1                    | chr12: 98523843-98526583; +   |
| CUST_87368_PI428753551 | 0.012   | 3.53        | seq30516-2                | UCSC                | uc007rhj.2                    | chr13: 80883421-80896043; +   |
| CUST_89336_PI428753551 | 0.001   | 3.47        | seq31188-1                | UCSC                | uc008esv.1                    | chr18: 39362582-39367054; +   |
| CUST_17402_PI428753551 | 0.011   | 3.46        | seq6139-3                 | Fantom3.0           | ri 5730583K17 PX00645M13 1507 | Unknown                       |
| CUST_44014_PI428753551 | 0.001   | 3.35        | seq15454-1                | Fantom3.0           | ri A830098B18 PX00157A12 2035 | Unknown                       |
| A_30_P01032515         | 0.005   | 3.32        | chr13:67211950-67217199_R | Aglient G3 8 × 60 K | Unknown                       | chr13: 67211950-67217199; -   |
| CUST_84985_PI428753551 | 0.014   | 3.31        | seq29706-3                | UCSC                | uc011wph.1                    | chr1:91415981-91459328; -     |
| CUST_87369_PI428753551 | 0.018   | 3.30        | seq30516-3                | UCSC                | uc007rhj.2                    | chr13: 80883421-80896043; +   |
| CUST_86956_PI428753551 | 0.001   | 3.28        | seq30374-3                | UCSC                | uc007oqy.1                    | chr12: 98523843-98526583; +   |
| CUST_25101_PI428753551 | 0.002   | 3.25        | seq8848-1                 | Fantom3.0           | ri 9130221J18 PX00061D13 2012 | Unknown                       |
| CUST_34061_PI428753551 | 0.009   | 3.23        | seq11944-3                | Fantom3.0           | ri A230042E21 PX00692L23 1370 | Unknown                       |
| CUST_28754_PI428753551 | 0.005   | 3.12        | seq10115-3                | Fantom3.0           | ri 9530055D10 PX00653H14 2290 | chr6: 145857293-145859583; -  |
| CUST_49094_PI428753551 | 0.004   | 3.11        | seq17238-3                | Fantom3.0           | ri B930060P07 PX00164N22 2100 | Unknown                       |
| CUST_62847_PI428753551 | 0.001   | 2.93        | seq21992-1                | Fantom3.0           | ri D630008D04 PX00196M03 1007 | Unknown                       |
| CUST_25103_PI428753551 | 0.002   | 2.91        | seq8848-3                 | Fantom3.0           | ri 9130221J18 PX00061D13 2012 | Unknown                       |
| CUST_63021_PI428753551 | 0.042   | 2.85        | seq22053-3                | Fantom3.0           | ri D630020N23 PX00197O18 1929 | chr19: 18638350-18640279; +   |
| CUST_88089_PI428753551 | 0.003   | 2.81        | seq30763-3                | UCSC                | uc007wgq.1                    | chr15: 75131376-75133807; -   |
| CUST_52740_PI428753551 | 0.025   | 2.75        | seq18500-3                | Fantom3.0           | ri C130087E15 PX00172D19 2060 | Unknown                       |

Table S1. Cont.

| Probe Name             | p-Value | Fold Change | Sequence Name | LncRNA Source | LncRNA Accession No-          | LncRNA Location               |
|------------------------|---------|-------------|---------------|---------------|-------------------------------|-------------------------------|
| CUST_16221_PI428753551 | 0.019   | 2.71        | seq5729-2     | Fantom3.0     | ri 5330405H16 PX00053O21 3487 | chr4: 151033075-151036561; -  |
| CUST_6974_PI428753551  | 0.008   | 2.68        | seq2469-3     | Fantom3.0     | ri 2310028D20 ZX00039H19 1738 | chr15: 81825121-81826859; =   |
| CUST_31121_PI428753551 | 0.036   | 2.66        | seq10920-3    | Fantom3.0     | ri A030006L04 PX00063O10 3044 | chr4:32285689-32288735; +     |
| CUST_56589_PI428753551 | 0.000   | 2.64        | seq19828-3    | Fantom3.0     | ri C730038H21 PX00740C01 2784 | Unknown                       |
| CUST_65266_PI428753551 | 0.013   | 2.64        | seq22837-2    | Fantom3.0     | ri D930024J08 PX00202F21 1435 | chr15: 22882397-22883831; +   |
| CUST_16264_PI428753551 | 0.015   | 2.62        | seq5744-3     | Fantom3.0     | ri 5330409N07 PX00053M17 2806 | Unknown                       |
| CUST_59265_PI428753551 | 0.017   | 2.60        | seq20748-2    | Fantom3.0     | ri D130070L05 PX00186E11 2248 | Unknown                       |
| CUST_37986_PI428753551 | 0.000   | 2.59        | seq13340-3    | Fantom3.0     | ri A530016B22 PX00140L19 752  | Unknown                       |
| CUST_69671_PI428753551 | 0.020   | 2.58        | seq24368-1    | Fantom3.0     | ri E330039K20 PX00319A15 2183 | chr9: 46239840-46242032; -    |
| CUST_48087_PI428753551 | 0.033   | 2.57        | seq16888-3    | Fantom3.0     | ri B930001F21 PX00162H09 2944 | Unknown                       |
| CUST_1019_PI428753551  | 0.023   | 2.57        | seq362-2      | Ensembl       | ENSMUST00000143291            | chr11: 119220160-119222473; + |
| CUST_6509_PI428753551  | 0.001   | 2.53        | seq2304-1     | Fantom3.0     | ri 2200003J05 R000023F20 593  | chr8: 61395402-61395993; -    |
| CUST_15820_PI428753551 | 0.006   | 2.53        | seq5589-2     | Fantom3.0     | ri 4933433F08 PX00021J17 1171 | Unknown                       |
| CUST_6973_PI428753551  | 0.009   | 2.49        | seq2469-2     | Fantom3.0     | ri 2310028D20 ZX00039H19 1738 | chr15: 81825121-81826859; +   |
| CUST_46057_PI428753551 | 0.008   | 2.48        | seq16184-3    | Fantom3.0     | ri B230206C11 PX00718B14 2474 | Unknown                       |
| CUST_73659_PI428753551 | 0.001   | 2.47        | seq25789-3    | Fantom3.0     | ri F830104F12 PM00025A21 2735 | chr2: 155826144-155828880; +  |
| CUST_91614_PI428753551 | 0.001   | 2.44        | seq31960-3    | UCSC          | uc008vex.2                    | chr4: 134356372-134372547; -  |
| CUST_25102_PI428753551 | 0.007   | 2.43        | seq8848-2     | Fantom3.0     | ri 9130221J18 PX00061D13 2012 | Unknown                       |
| CUST_88755_PI428753551 | 0.015   | 2.38        | seq30990-1    | UCSC          | uc008afl.2                    | chr17: 5941279-6038555; +     |
| CUST_68779_PI428753551 | 0.016   | 2.37        | seq24055-3    | Fantom3.0     | ri E230024E19 PX00210C21 2564 | Unknown                       |
| CUST_88757_PI428753551 | 0.012   | 2.35        | seq30990-3    | UCSC          | uc008afl.2                    | chr17: 5941279-6038555; +     |
| CUST_3494_PI428753551  | 0.001   | 2.35        | seq1229-3     | Fantom3.0     | ri 1110020M10 R000016P19 1047 | Unknown                       |
| CUST_35718_PI428753551 | 0.038   | 2.35        | seq12532-1    | Fantom3.0     | ri A330065D06 PX00132H01 2720 | chr7: 110122743-110143283; +  |
| CUST_3069_PI428753551  | 0.012   | 2.34        | seq1083-3     | Fantom3.0     | ri 0610039G09 R000004L11 597  | Unknown                       |
| CUST_56299_PI428753551 | 0.035   | 2.34        | seq19727-1    | Fantom3.0     | ri C730004J18 PX00698C15 2764 | Unknown                       |
| CUST_63019_PI428753551 | 0.036   | 2.34        | seq22053-1    | Fantom3.0     | ri D630020N23 PX00197O18 1929 | chr19: 18638350-18640279; +   |
| CUST_48179_PI428753551 | 0.011   | 2.33        | seq16919-3    | Fantom3.0     | ri B930006H01 PX00162O08 2572 | Unknown                       |
| CUST_94177_PI428753551 | 0.001   | 2.32        | seq32828-3    | UCSC          | uc012ggw.1                    | chr8: 84001705-84004770; +    |
| CUST_53390_PI428753551 | 0.021   | 2.30        | seq18725-1    | Fantom3.0     | ri C230024E18 PX00173L17 3174 | Unknown                       |
| CUST_48086_PI428753551 | 0.015   | 2.28        | seq16888-2    | Fantom3.0     | ri B930001F21 PX00162H09 2944 | Unknown                       |
| CUST_24565_PI428753551 | 0.023   | 2.28        | seq8662-3     | Fantom3.0     | ri 8430438G05 PX00714L21 1416 | Unknown                       |
| CUST_89337_PI428753551 | 0.002   | 2.28        | seq31188-2    | UCSC          | uc008esv.1                    | chr18: 39362582-39367054; +   |
| CUST_46055_PI428753551 | 0.037   | 2.28        | seq16184-1    | Fantom3.0     | ri B230206C11 PX00718B14 2474 | Unknown                       |
| CUST_37985_PI428753551 | 0.000   | 2.27        | seq13340-2    | Fantom3.0     | ri A530016B22 PX00140L19 752  | Unknown                       |
| CUST_79983_PI428753551 | 0.021   | 2.27        | seq28010-3    | NCBI Refseq   | gi 339515665 ref NR_040310.1  | Unknown                       |

Table S1. Cont.

| Probe Name             | p-Value | Fold Change | Sequence Name              | LncRNA Source       | LncRNA Acession No-           | LncRNA Location              |
|------------------------|---------|-------------|----------------------------|---------------------|-------------------------------|------------------------------|
| CUST_80640_PI428753551 | 0.042   | 2.25        | seq28235-2                 | NCBI Refseq         | gi 325995141 ref NR_037956.1  | Unknown                      |
| CUST_38958_PI428753551 | 0.015   | 2.25        | seq13682-1                 | Fantom3.0           | ri A530087K12 PX00143G22 2336 | chr2: 57368383-57370719; +   |
| CUST_88567_PI428753551 | 0.013   | 2.24        | seq30925-3                 | UCSC                | uc007zbn.1                    | chr16: 35658439-35662898; +  |
| CUST_92788_PI428753551 | 0.010   | 2.24        | seq32359-1                 | UCSC                | uc009cvm.1                    | chr6: 88716423-88725860; -   |
| CUST_92790_PI428753551 | 0.003   | 2.23        | seq32359-3                 | UCSC                | uc009cvm.1                    | chr6: 88716423-88725860; -   |
| CUST_73255_PI428753551 | 0.030   | 2.23        | seq25644-1                 | Fantom3.0           | ri F830034C20 PS00004O21 1390 | chr15: 7199925-7201309; +    |
| CUST_88933_PI428753551 | 0.000   | 2.23        | seq31050-3                 | UCSC                | uc008bun.1                    | chr17: 31152751-31163052; +  |
| CUST_15854_PI428753551 | 0.023   | 2.23        | seq5601-1                  | Fantom3.0           | ri 4933433O05 PX00642I22 2085 | Unknown                      |
| CUST_6972_PI428753551  | 0.017   | 2.23        | seq2469-1                  | Fantom3.0           | ri 2310028D20 ZX00039H19 1738 | chr15: 81825121-81826859; +  |
| CUST_53392_PI428753551 | 0.013   | 2.23        | seq18725-3                 | Fantom3.0           | ri C230024E18 PX00173L17 3174 | Unknown                      |
| CUST_6236_PI428753551  | 0.010   | 2.22        | seq2205-3                  | Fantom3.0           | ri 2010002C16 ZX00057O18 689  | Unknown                      |
| A_30_P01026616         | 0.029   | 2.22        | chr7:134649844-134651551_F | Aglient G3 8 × 60 K | Unknown                       | chr7: 134649844-134651551; + |
| A_30_P01031796         | 0.001   | 2.21        | chr6:35201798-35217831_R   | Aglient G3 8 × 60 K | Unknown                       | chr6: 35201798-35217831; -   |
| CUST_46056_PI428753551 | 0.002   | 2.19        | seq16184-2                 | Fantom3.0           | ri B230206C11 PX00718B14 2474 | Unknown                      |
| A_30_P01020529         | 0.044   | 2.18        | chr1:64686823-64728598_F   | Aglient G3 8 × 60 K | Unknown                       | chr1: 64686823-64728598; +   |
| CUST_84717_PI428753551 | 0.027   | 2.18        | seq29616-1                 | UCSC                | uc007aet.1                    | chr1: 3205903-3215632; -     |
| CUST_91879_PI428753551 | 0.045   | 2.16        | seq32049-3                 | UCSC                | uc008wti.2                    | chr5: 26460069-26493314; -   |
| CUST_85432_PI428753551 | 0.003   | 2.14        | seq29857-2                 | UCSC                | uc007eim.1                    | chr10: 7780267-7781356; +    |
| CUST_56656_PI428753551 | 0.026   | 2.13        | seq19851-2                 | Fantom3.0           | ri C730047E03 PX00087F06 2840 | Unknown                      |
| CUST_52687_PI428753551 | 0.013   | 2.12        | seq18482-3                 | Fantom3.0           | ri C130085F16 PX00172M20 3120 | Unknown                      |
| CUST_89631_PI428753551 | 0.035   | 2.12        | seq31288-2                 | UCSC                | uc008gpa.1                    | chr19:10063631-10064017; -   |
| CUST_37984_PI428753551 | 0.001   | 2.12        | seq13340-1                 | Fantom3.0           | ri A530016B22 PX00140L19 752  | Unknown                      |
| CUST_39807_PI428753551 | 0.008   | 2.12        | seq13981-3                 | Fantom3.0           | ri A630035A22 PX00145E21 2301 | Unknown                      |
| CUST_20043_PI428753551 | 0.028   | 2.11        | seq7059-3                  | Fantom3.0           | ri 6330570G11 PX00717G08 2177 | Unknown                      |
| CUST_89632_PI428753551 | 0.042   | 2.10        | seq31288-3                 | UCSC                | uc008gpa.1                    | chr19: 10063631-10064017; -  |
| CUST_89630_PI428753551 | 0.032   | 2.09        | seq31288-1                 | UCSC                | uc008gpa.1                    | chr19: 10063631-10064017; -  |
| CUST_92275_PI428753551 | 0.036   | 2.08        | seq32184-2                 | UCSC                | uc008znd.1                    | chr5: 123103043-123132629; - |
| CUST_87267_PI428753551 | 0.046   | 2.07        | seq30481-1                 | UCSC                | uc007qsa.1                    | chr13: 55775946-55784479; -  |
| CUST_19210_PI428753551 | 0.035   | 2.06        | seq6769-2                  | Fantom3.0           | ri 6030497D23 PX00058B20 1541 | Unknown                      |
| CUST_78296_PI428753551 | 0.036   | 2.05        | seq27440-1                 | NCBI Refseq         | gi 344313180 ref NR_045032.1  | Unknown                      |
| CUST_3428_PI428753551  | 0.047   | 2.05        | seq1206-2                  | Fantom3.0           | ri 1110018D14 R000016D15 339  | chr2: 164564180-164568494; + |
| CUST_84323_PI428753551 | 0.001   | 2.04        | seq29484-1                 | ucr                 | uc.414-                       | chr11: 98768057-98768303; -  |
| CUST_48995_PI428753551 | 0.045   | 2.04        | seq17205-3                 | Fantom3.0           | ri B930054E24 PX00164L12 2279 | chr15: 59076743-59079022; -  |
| CUST_50489_PI428753551 | 0.042   | 2.04        | seq17727-2                 | Fantom3.0           | ri C130006C19 PX00167J04 2090 | Unknown                      |
| CUST_88932_PI428753551 | 0.000   | 2.03        | seq31050-2                 | UCSC                | uc008bun.1                    | chr17: 31152751-31163052; +  |

Table S1. Cont.

| Probe Name             | p-Value | Fold Change | Sequence Name             | LncRNA Source       | LncRNA Accession No-          | LncRNA Location               |
|------------------------|---------|-------------|---------------------------|---------------------|-------------------------------|-------------------------------|
| CUST_34060_PI428753551 | 0.001   | 2.02        | seq11944-1                | Fantom3.0           | ri A230042E21 PX00692L23 1370 | Unknown                       |
| CUST_54584_PI428753551 | 0.024   | 2.02        | seq19135-2                | Fantom3.0           | ri C230084J24 PX00177I12 2679 | Unknown                       |
| CUST_8303_PI428753551  | 0.003   | 2.02        | seq2937-2                 | Fantom3.0           | ri 2810408I11 ZX00046B17 713  | chr1: 64679870-64690659; -    |
| CUST_15735_PI428753551 | 0.006   | 2.01        | seq5560-3                 | Fantom3.0           | ri 4933429D07 PX00021K03 2483 | chr15: 85803106-85805588; +   |
| CUST_41286_PI428753551 | 0.044   | 2.01        | seq14493-1                | Fantom3.0           | ri A730014F12 PX00149E03 2760 | Unknown                       |
| CUST_32132_PI428753551 | 0.032   | 2.00        | seq11271-3                | Fantom3.0           | ri A130035K06 PX00122H17 1738 | Unknown                       |
| CUST_11040_PI428753551 | 0.002   | 0.50        | seq3890-3                 | Fantom3.0           | ri 4833421B09 PX00028G19 1261 | Unknown                       |
| CUST_81754_PI428753551 | 0.028   | 0.50        | seq28613-3                | NCBI Refseq         | gi 407971021 ref NR_073190.1  | Unknown                       |
| CUST_40335_PI428753551 | 0.018   | 0.50        | seq14165-2                | Fantom3.0           | ri A630059D12 PX00146J13 2639 | Unknown                       |
| CUST_90586_PI428753551 | 0.000   | 0.49        | seq31611-2                | UCSC                | uc008nqe.1                    | chr2: 158375637-158386145; +  |
| CUST_1594_PI428753551  | 0.019   | 0.49        | seq563-3                  | Ensembl             | ENSMUST00000136322            | chr9: 44478778-44482180; +    |
| CUST_40336_PI428753551 | 0.005   | 0.49        | seq14165-3                | Fantom3.0           | ri A630059D12 PX00146J13 2639 | Unknown                       |
| CUST_7927_PI428753551  | 0.037   | 0.49        | seq2804-2                 | Fantom3.0           | ri 2700004G04 ZX00062J14 315  | chr1: 167371968-167372282; -  |
| A_30_P01032333         | 0.017   | 0.49        | chr8:10886200-10905925_F  | Aglient G3 8 × 60 K | Unknown                       | chr8: 10886200-10905925; +    |
| CUST_88347_PI428753551 | 0.032   | 0.49        | seq30851-3                | UCSC                | uc011zzj.1                    | chr15: 100353199-100384435; + |
| CUST_94429_PI428753551 | 0.013   | 0.49        | seq32915-1                | UCSC                | uc029wwz.1                    | chr8: 129263640-129271868; +  |
| CUST_68590_PI428753551 | 0.002   | 0.49        | seq23987-2                | Fantom3.0           | ri E230014A17 PX00675N03 3275 | Unknown                       |
| CUST_75433_PI428753551 | 0.035   | 0.48        | seq26422-3                | Fantom3.0           | ri G430129M11 PH00002I21 1112 | Unknown                       |
| CUST_94570_PI428753551 | 0.020   | 0.48        | seq32963-3                | UCSC                | uc009pfk.1                    | chr9: 45182014-45192968; +    |
| CUST_50209_PI428753551 | 0.006   | 0.48        | seq17630-2                | Fantom3.0           | ri C030033M12 PX00074J01 1267 | chr7: 97691503-97692767; +    |
| CUST_69888_PI428753551 | 0.011   | 0.48        | seq24446-3                | Fantom3.0           | ri E430014L16 PX00098F03 3497 | Unknown                       |
| CUST_68615_PI428753551 | 0.023   | 0.48        | seq23996-2                | Fantom3.0           | ri E230014O04 PX00209J17 2757 | Unknown                       |
| CUST_6890_PI428753551  | 0.000   | 0.48        | seq2441-1                 | Fantom3.0           | ri 2310015A16 ZX00039C04 775  | chr17: 31907878-31909029; -   |
| A_30_P01029699         | 0.013   | 0.48        | chr12:77544397-77564122_F | Aglient G3 8 × 60 K | Unknown                       | chr12: 77544397-77564122; +   |
| CUST_1570_PI428753551  | 0.022   | 0.48        | seq555-3                  | Ensembl             | ENSMUST00000159268            | chr9: 14845613-14847835; +    |
| A_30_P01029722         | 0.002   | 0.48        | chr13:41337973-41379821_R | Aglient G3 8 × 60 K | Unknown                       | chr13:41337973-41379821; -    |
| CUST_43541_PI428753551 | 0.006   | 0.48        | seq15286-3                | Fantom3.0           | ri A830039N02 PX00661D20 1825 | chrX: 36365031-36366856; +    |
| CUST_93501_PI428753551 | 0.003   | 0.48        | seq32599-2                | UCSC                | uc009idd.1                    | chr7: 82646167-82648528; -    |
| CUST_95272_PI428753551 | 0.001   | 0.48        | seq33201-2                | UCSC                | uc029xog.1                    | chrX: 164402330-164402650; +  |
| CUST_31670_PI428753551 | 0.037   | 0.48        | seq11109-2                | Fantom3.0           | ri A130020J19 PX00121N05 1799 | Unknown                       |
| CUST_8371_PI428753551  | 0.022   | 0.48        | seq2962-1                 | Fantom3.0           | ri 2810425J22 ZX00066E19 1403 | chr5: 118008789-118010193; +  |
| A_30_P01020035         | 0.025   | 0.47        | chr4:88745770-88774130_R  | Aglient G3 8 × 60 K | Unknown                       | chr4: 88745770-88774130; -    |
| CUST_28863_PI428753551 | 0.003   | 0.47        | seq10152-2                | Fantom3.0           | ri 9530065L16 PX00113I24 1053 | chr15: 62039256-62249218; +   |
| CUST_56688_PI428753551 | 0.004   | 0.47        | seq19862-2                | Fantom3.0           | ri C730049O14 PX00087L24 1634 | Unknown                       |
| A_30_P01027654         | 0.001   | 0.47        | chr15:62046023-62082530_F | Aglient G3 8 × 60 K | Unknown                       | chr15: 62046023-62082530; +   |

Table S1. Cont.

| Probe Name             | p-Value | Fold Change | Sequence Name              | LncRNA Source       | LncRNA Acession No-           | LncRNA Location               |
|------------------------|---------|-------------|----------------------------|---------------------|-------------------------------|-------------------------------|
| CUST_25597_PI428753551 | 0.038   | 0.47        | seq9023-3                  | Fantom3.0           | ri 9230112I12 PX00062C09 1335 | chr16: 90440654-90441987; +   |
| CUST_80219_PI428753551 | 0.001   | 0.47        | seq28090-3                 | NCBI Refseq         | gi 242332555 ref NR_027961.1  | Unknown                       |
| CUST_11277_PI428753551 | 0.008   | 0.46        | seq3973-3                  | Fantom3.0           | ri 4833445E02 PX00313B08 1768 | chr12: 26306800-26308568; -   |
| A_30_P01032931         | 0.048   | 0.46        | chr12:81217572-81233910_R  | Aglient G3 8 × 60 K | Unknown                       | chr12: 81217572-81233910; -   |
| CUST_86465_PI428753551 | 0.001   | 0.46        | seq30208-2                 | UCSC                | uc007lgb.1                    | chr11: 98350861-98357795; +   |
| CUST_93918_PI428753551 | 0.044   | 0.46        | seq32741-2                 | UCSC                | uc009kux.1                    | chr8: 10899921-10903874; +    |
| CUST_68220_PI428753551 | 0.005   | 0.46        | seq23859-3                 | Fantom3.0           | ri E130217H01 PX00675K21 3578 | Unknown                       |
| CUST_31671_PI428753551 | 0.025   | 0.46        | seq11109-3                 | Fantom3.0           | ri A130020J19 PX00121N05 1799 | Unknown                       |
| CUST_65027_PI428753551 | 0.005   | 0.46        | seq22754-3                 | Fantom3.0           | ri D930018I20 PX00201L09 607  | Unknown                       |
| CUST_64023_PI428753551 | 0.006   | 0.45        | seq22407-3                 | Fantom3.0           | ri D830016D23 PX00198L15 3164 | Unknown                       |
| CUST_59049_PI428753551 | 0.003   | 0.45        | seq20675-3                 | Fantom3.0           | ri D130061L17 PX00185J03 2602 | Unknown                       |
| CUST_3022_PI428753551  | 0.000   | 0.45        | seq1067-1                  | Fantom3.0           | ri 0610011H04 R000002H19 401  | chr4: 154023310-154025651; 0  |
| CUST_38852_PI428753551 | 0.001   | 0.45        | seq13644-3                 | Fantom3.0           | ri A530083F01 PX00143I09 1014 | Unknown                       |
| CUST_62203_PI428753551 | 0.006   | 0.45        | seq21763-3                 | Fantom3.0           | ri D430033D05 PX00195G04 3827 | chr4: 63135007-63138829; +    |
| CUST_68591_PI428753551 | 0.004   | 0.45        | seq23987-3                 | Fantom3.0           | ri E230014A17 PX00675N03 3275 | Unknown                       |
| CUST_2877_PI428753551  | 0.002   | 0.45        | seq1016-1                  | Ensembl             | ENSMUST00000150851            | chr12: 109549255-109549775; + |
| CUST_2935_PI428753551  | 0.025   | 0.45        | seq1036-3                  | Ensembl             | ENSMUST00000135144            | chr3: 89315439-89318907; +    |
| A_30_P01031483         | 0.000   | 0.45        | chr15:62046023-62082530_F  | Aglient G3 8 × 60 K | Unknown                       | chr15: 62046023-62082530; +   |
| CUST_6087_PI428753551  | 0.005   | 0.45        | seq2153-2                  | Fantom3.0           | ri 1810034M13 ZX00155P23 722  | chr11: 57970243-57973137; -   |
| CUST_11555_PI428753551 | 0.001   | 0.45        | seq4069-3                  | Fantom3.0           | ri 4921534G14 PX00713F12 992  | Unknown                       |
| CUST_88041_PI428753551 | 0.004   | 0.45        | seq30747-2                 | UCSC                | uc007vyl.1                    | chr15: 62037986-62258637; +   |
| CUST_94841_PI428753551 | 0.001   | 0.44        | seq33055-2                 | UCSC                | uc029xfu.1                    | chr9                          |
| CUST_35567_PI428753551 | 0.012   | 0.44        | seq12478-3                 | Fantom3.0           | ri A330052A13 PX00742H08 1244 | Unknown                       |
| CUST_70976_PI428753551 | 0.012   | 0.44        | seq24831-3                 | Fantom3.0           | ri F630104J01 PL00015H17 3892 | Unknown                       |
| CUST_89974_PI428753551 | 0.003   | 0.44        | seq31404-3                 | UCSC                | uc008irs.1                    | chr2: 25361491-25365626; -    |
| A_30_P01026769         | 0.003   | 0.44        | chr3:45081952-45092352_F   | Aglient G3 8 × 60 K | Unknown                       | chr3: 45081952-45092352; +    |
| CUST_3001_PI428753551  | 0.004   | 0.44        | seq1059-3                  | Fantom3.0           | ri 0610007F13 R000001H01 803  | chr4: 115090931-115093863; +  |
| CUST_36448_PI428753551 | 0.012   | 0.44        | seq12792-2                 | Fantom3.0           | ri A430025P12 PX00724F15 435  | Unknown                       |
| A_30_P01018666         | 0.049   | 0.43        | chr3:146629425-146649125_F | Aglient G3 8 × 60 K | Unknown                       | chr3: 146629425-146649125; +  |
| A_30_P01025687         | 0.003   | 0.43        | chr15:61984389-62102500_F  | Aglient G3 8 × 60 K | Unknown                       | chr15: 61984389-62102500; +   |
| CUST_81152_PI428753551 | 0.008   | 0.43        | seq28410-2                 | NCBI Refseq         | gi 353523863 ref NR_045347.1  | Unknown                       |
| CUST_3024_PI428753551  | 0.001   | 0.43        | seq1067-3                  | Fantom3.0           | ri 0610011H04 R000002H19 401  | chr4: 154023310-15402565; -   |
| CUST_94842_PI428753551 | 0.000   | 0.43        | seq33055-3                 | UCSC                | uc029xfu.1                    | chr9: 103086109-103088267; +  |
| CUST_36447_PI428753551 | 0.019   | 0.42        | seq12792-1                 | Fantom3.0           | ri A430025P12 PX00724F15 435  | Unknown                       |
| CUST_70722_PI428753551 | 0.015   | 0.42        | seq24742-2                 | Fantom3.0           | ri F530212E09 PS00003N05 1281 | Unknown                       |



Table S1. Cont.

| Probe Name             | p-Value | Fold Change | Sequence Name              | LncRNA Source       | LncRNA Acession No-           | LncRNA Location              |
|------------------------|---------|-------------|----------------------------|---------------------|-------------------------------|------------------------------|
| CUST_43540_PI428753551 | 0.024   | 0.42        | seq15286-2                 | Fantom3.0           | ri A830039N02 PX00661D20 1825 | chrX: 36365031-36366856; +   |
| CUST_91723_PI428753551 | 0.001   | 0.42        | seq31997-1                 | UCSC                | uc008waz.2                    | chr4: 154020469-154025621; - |
| CUST_77946_PI428753551 | 0.001   | 0.41        | seq27321-1                 | NCBI Refseq         | gi 84781715 ref NR_002700.1   | Unknown                      |
| CUST_65289_PI428753551 | 0.013   | 0.41        | seq22845-2                 | Fantom3.0           | ri D930025F21 PX00202H11 2836 | Unknown                      |
| CUST_42051_PI428753551 | 0.045   | 0.41        | seq14756-3                 | Fantom3.0           | ri A730053D01 PX00151A14 586  | chr10: 93317402-93322725; +  |
| CUST_93919_PI428753551 | 0.044   | 0.41        | seq32741-3                 | UCSC                | uc009kux.1                    | chr8: 10899921-10903874; +   |
| CUST_59048_PI428753551 | 0.015   | 0.41        | seq20675-2                 | Fantom3.0           | ri D130061L17 PX00185J03 2602 | Unknown                      |
| A_30_P01021311         | 0.000   | 0.41        | chr9:78107225-78118850_R   | Aglient G3 8 × 60 K | Unknown                       | chr9:78107225-78118850; -    |
| CUST_1667_PI428753551  | 0.001   | 0.41        | seq589-3                   | Ensembl             | ENSMUST00000146054            | chr4:154023311-154026150; -  |
| CUST_65290_PI428753551 | 0.001   | 0.41        | seq22845-3                 | Fantom3.0           | ri D930025F21 PX00202H11 2836 | Unknown                      |
| CUST_1421_PI428753551  | 0.008   | 0.41        | seq505-2                   | Ensembl             | ENSMUST00000150171            | chr4:129263730-129265010; +  |
| CUST_34193_PI428753551 | 0.001   | 0.40        | seq11990-2                 | Fantom3.0           | ri A230053F13 PX00128A20 3998 | chr4:154021460-154026152; -  |
| CUST_6216_PI428753551  | 0.038   | 0.40        | seq2198-3                  | Fantom3.0           | ri 1810074C23 ZX00081O02 389  | chr8: 9417924-94180325; +    |
| CUST_69633_PI428753551 | 0.024   | 0.40        | seq24355-2                 | Fantom3.0           | ri E330038F23 PX00312H20 2441 | Unknown                      |
| CUST_73375_PI428753551 | 0.032   | 0.40        | seq25685-2                 | Fantom3.0           | ri F830037N24 PL00007C18 2867 | Unknown                      |
| CUST_6993_PI428753551  | 0.002   | 0.39        | seq2476-1                  | Fantom3.0           | ri 2310031A18 ZX00039N07 888  | chr8: 124740257-124741144; - |
| CUST_85313_PI428753551 | 0.006   | 0.39        | seq29816-3                 | UCSC                | uc007dvi.1                    | chr1: 178937109-178939199; + |
| CUST_28392_PI428753551 | 0.046   | 0.39        | seq9992-2                  | Fantom3.0           | ri 9530024C23 PX00111L16 396  | chr7: 4149812-4150208; -     |
| CUST_1664_PI428753551  | 0.000   | 0.39        | seq588-3                   | Ensembl             | ENSMUST00000145527            | chr4: 154023311-154024355; - |
| CUST_77947_PI428753551 | 0.002   | 0.39        | seq27321-2                 | NCBI Refseq         | gi 84781715 ref NR_002700.1   | Unknown                      |
| A_30_P01030223         | 0.025   | 0.39        | chr2:119697845-119719245_F | Aglient G3 8 × 60 K | Unknown                       | chr2: 119697845-119719245; + |
| CUST_92466_PI428753551 | 0.006   | 0.39        | seq32249-1                 | UCSC                | uc009aur.2                    | chr5:151406503-151432119; +  |
| CUST_70723_PI428753551 | 0.021   | 0.39        | seq24742-3                 | Fantom3.0           | ri F530212E09 PS00003N05 1281 | Unknown                      |
| CUST_76617_PI428753551 | 0.009   | 0.39        | seq26843-3                 | Fantom3.0           | ri I1C0003N05 FU00001K12 1299 | Unknown                      |
| CUST_17832_PI428753551 | 0.001   | 0.39        | seq6291-2                  | Fantom3.0           | ri 5830447G06 PX00645N15 2148 | Unknown                      |
| CUST_22296_PI428753551 | 0.005   | 0.38        | seq7847-3                  | Fantom3.0           | ri 7030418N07 PX00650C18 1744 | Unknown                      |
| CUST_94569_PI428753551 | 0.002   | 0.38        | seq32963-2                 | UCSC                | uc009pfk.1                    | chr9: 45182014-45192968; +   |
| CUST_69848_PI428753551 | 0.013   | 0.38        | seq24432-3                 | Fantom3.0           | ri E430013E17 PX00098I12 1138 | Unknown                      |
| CUST_22295_PI428753551 | 0.002   | 0.38        | seq7847-2                  | Fantom3.0           | ri 7030418N07 PX00650C18 1744 | Unknown                      |
| A_30_P01023153         | 0.023   | 0.38        | chr12:74135916-74142780_F  | Aglient G3 8 × 60 K | Unknown                       | chr12: 74135916-74142780; +  |
| CUST_94066_PI428753551 | 0.001   | 0.38        | seq32791-2                 | UCSC                | uc009lwr.1                    | chr8: 68880554-68907448; +   |
| CUST_69201_PI428753551 | 0.041   | 0.37        | seq24206-1                 | Fantom3.0           | ri E330015J04 PX00675D12 1730 | Unknown                      |
| CUST_31052_PI428753551 | 0.045   | 0.37        | seq10897-3                 | Fantom3.0           | ri 9930118G10 PX00718M15 1380 | Unknown                      |
| CUST_31128_PI428753551 | 0.016   | 0.36        | seq10923-1                 | Fantom3.0           | ri A030007K14 PX00063E18 1900 | Unknown                      |
| CUST_25755_PI428753551 | 0.000   | 0.36        | seq9080-1                  | Fantom3.0           | ri 9330010C10 PX00324G22 2717 | Unknown                      |

Table S1. Cont.

| Probe Name             | p-Value | Fold Change | Sequence Name               | LncRNA Source       | LncRNA Acession No-           | LncRNA Location               |
|------------------------|---------|-------------|-----------------------------|---------------------|-------------------------------|-------------------------------|
| CUST_56439_PI428753551 | 0.007   | 0.36        | seq19775-3                  | Fantom3.0           | ri C730020I24 PX00086L21 432  | chr4: 11611139-11615007; -    |
| CUST_39241_PI428753551 | 0.013   | 0.36        | seq13781-3                  | Fantom3.0           | ri A630005I04 PX00143J18 3500 | chr7: 113240249-113243748; +  |
| CUST_6995_PI428753551  | 0.003   | 0.36        | seq2476-3                   | Fantom3.0           | ri 2310031A18 ZX00039N07 888  | chr8: 124740257-124741144; -  |
| CUST_6994_PI428753551  | 0.004   | 0.36        | seq2476-2                   | Fantom3.0           | ri 2310031A18 ZX00039N07 888  | chr8: 124740257-124741144; -  |
| A_30_P01021437         | 0.000   | 0.36        | chr17:32035750-32056000_R   | Aglient G3 8 × 60 K | Unknown                       | chr17: 32035750-32056000; -   |
| CUST_87031_PI428753551 | 0.011   | 0.36        | seq30399-3                  | UCSC                | uc011yum.1                    | chr12: 110275384-110278068; - |
| A_30_P01032927         | 0.006   | 0.35        | chr3:121615836-121616109_F  | Aglient G3 8 × 60 K | Unknown                       | chr3: 121615836-121616109; +  |
| CUST_94069_PI428753551 | 0.001   | 0.35        | seq32792-2                  | UCSC                | uc029wtn.1                    | chr8: 68905542-68906931; +    |
| CUST_56438_PI428753551 | 0.008   | 0.35        | seq19775-2                  | Fantom3.0           | ri C730020I24 PX00086L21 432  | chr4: 11611139-11615007; -    |
| CUST_94070_PI428753551 | 0.001   | 0.35        | seq32792-3                  | UCSC                | uc029wtn.1                    | chr8: 68905542-68906931; +    |
| A_30_P01030951         | 0.016   | 0.34        | chr8:10886200-10905925_F    | Aglient G3 8 × 60 K | Unknown                       | chr8: 10886200-10905925; +    |
| CUST_77800_PI428753551 | 0.002   | 0.34        | seq27270-3                  | lncrnadb            | MEG9_EU616813.1               | Unknown                       |
| CUST_22294_PI428753551 | 0.002   | 0.34        | seq7847-1                   | Fantom3.0           | ri 7030418N07 PX00650C18 1744 | Unknown                       |
| A_30_P01029662         | 0.012   | 0.33        | chr8:10886200-10905925_F    | Aglient G3 8 × 60 K | Unknown                       | chr8: 10886200-10905925; +    |
| CUST_56613_PI428753551 | 0.009   | 0.33        | seq19836-3                  | Fantom3.0           | ri C730040I22 PX00087D14 736  | Unknown                       |
| CUST_77948_PI428753551 | 0.002   | 0.33        | seq27321-3                  | NCBI Refseq         | gi 84781715 ref NR_002700.1   | Unknown                       |
| CUST_42418_PI428753551 | 0.000   | 0.33        | seq14890-2                  | Fantom3.0           | ri A730074L22 PX00661C22 2537 | chr4: 81744945-81760133; +    |
| CUST_69632_PI428753551 | 0.022   | 0.32        | seq24355-1                  | Fantom3.0           | ri E330038F23 PX00312H20 2441 | Unknown                       |
| CUST_87022_PI428753551 | 0.000   | 0.31        | seq30396-3                  | UCSC                | uc011ysp.1                    | chr12: 109603944-109661711; + |
| CUST_6892_PI428753551  | 0.000   | 0.31        | seq2441-3                   | Fantom3.0           | ri 2310015A16 ZX00039C04 775  | chr17: 31907878-31909029; -   |
| CUST_77847_PI428753551 | 0.000   | 0.31        | seq27286-3                  | lncrnadb            | Rian_NR_028261.1              | Unknown                       |
| CUST_69847_PI428753551 | 0.012   | 0.31        | seq24432-2                  | Fantom3.0           | ri E430013E17 PX00098I12 1138 | Unknown                       |
| A_30_P01019807         | 0.000   | 0.30        | chr17:32035750-32056000_R   | Aglient G3 8 × 60 K | Unknown                       | chr17: 32035750-32056000; -   |
| CUST_12775_PI428753551 | 0.008   | 0.30        | seq4507-1                   | Fantom3.0           | ri 4930471I20 PX00032G07 630  | chr2: 155547040-155556930; -  |
| A_30_P01019750         | 0.000   | 0.30        | chr17:32044823-32045974_R   | Aglient G3 8 × 60 K | Unknown                       | chr17: 32044823-32045974; -   |
| CUST_87049_PI428753551 | 0.038   | 0.29        | seq30405-3                  | UCSC                | uc007pgh.1                    | chr12: 113259933-113265117; - |
| A_30_P01024995         | 0.000   | 0.29        | chr17:32044823-32045974_R   | Aglient G3 8 × 60 K | Unknown                       | chr17: 32044823-32045974; -   |
| CUST_50154_PI428753551 | 0.039   | 0.29        | seq17611-2                  | Fantom3.0           | ri C030026A16 PX00074B24 1881 | Unknown                       |
| CUST_50508_PI428753551 | 0.001   | 0.29        | seq17733-3                  | Fantom3.0           | ri C130007E11 PX00167D05 1553 | chr12: 109747902-109749455; + |
| A_30_P01023749         | 0.000   | 0.28        | chr17:32044823-32045974_R   | Aglient G3 8 × 60 K | Unknown                       | chr17: 32044823-32045974; -   |
| A_30_P01019873         | 0.002   | 0.28        | chr9:78107225-78118850_R    | Aglient G3 8 × 60 K | Unknown                       | chr9: 78107225-78118850; -    |
| CUST_6891_PI428753551  | 0.000   | 0.28        | seq2441-2                   | Fantom3.0           | ri 2310015A16 ZX00039C04 775  | chr17: 31907878-31909029; -   |
| A_30_P01026799         | 0.001   | 0.28        | chr12:110894095-110899517_F | Aglient G3 8 × 60 K | Unknown                       | chr12: 110894095-110899517; + |
| CUST_88365_PI428753551 | 0.008   | 0.28        | seq30857-3                  | UCSC                | uc007xuv.1                    | chr15: 102188542-102203163; - |
| CUST_80514_PI428753551 | 0.024   | 0.27        | seq28191-3                  | NCBI Refseq         | gi 262263311 ref NR_030715.1  | Unknown                       |

Table S1. Cont.

| Probe Name             | p-Value | Fold Change | Sequence Name               | LncRNA Source       | LncRNA Acession No-           | LncRNA Location               |
|------------------------|---------|-------------|-----------------------------|---------------------|-------------------------------|-------------------------------|
| CUST_65424_PI428753551 | 0.004   | 0.27        | seq22891-3                  | Fantom3.0           | ri D930029A11 PX00700N21 1364 | chr12: 109600820-109602181; + |
| CUST_69634_PI428753551 | 0.011   | 0.27        | seq24355-3                  | Fantom3.0           | ri E330038F23 PX00312H20 2441 | Unknown                       |
| CUST_6575_PI428753551  | 0.010   | 0.26        | seq2327-2                   | Fantom3.0           | ri 2210022F04 ZX00160I19 1074 | chr12: 21269099-21270170; +   |
| CUST_87025_PI428753551 | 0.001   | 0.26        | seq30397-3                  | UCSC                | uc011ytv.1                    | chr12: 109730275-109749457; + |
| CUST_90587_PI428753551 | 0.000   | 0.26        | seq31611-3                  | UCSC                | uc008nqe.1                    | chr2: 158375637-158386145; +  |
| CUST_6576_PI428753551  | 0.006   | 0.26        | seq2327-3                   | Fantom3.0           | ri 2210022F04 ZX00160I19 1074 | chr12: 21269099-21270170; +   |
| A_30_P01018142         | 0.001   | 0.26        | chr5:106982442-107045717_R  | Aglient G3 8 × 60 K | Unknown                       | chr5: 106982442-107045717; −  |
| CUST_87028_PI428753551 | 0.000   | 0.25        | seq30398-3                  | UCSC                | uc011ytw.1                    | chr12: 109730275-109749457; + |
| CUST_49885_PI428753551 | 0.030   | 0.25        | seq17517-3                  | Fantom3.0           | ri C030005P03 PX00073B14 2155 | Unknown                       |
| CUST_56114_PI428753551 | 0.041   | 0.25        | seq19661-3                  | Fantom3.0           | ri C630025E23 PX00698M17 4652 | Unknown                       |
| CUST_85494_PI428753551 | 0.016   | 0.23        | seq29878-2                  | UCSC                | uc011xbo.1                    | chr10: 22273473-22371114; +   |
| A_30_P01032469         | 0.003   | 0.23        | chr12:110842154-110883594_F | Aglient G3 8 × 60 K | Unknown                       | chr12: 110842154-110883594; + |
| A_30_P01033149         | 0.002   | 0.23        | chr9:68349343-68411643_F    | Aglient G3 8 × 60 K | Unknown                       | chr9: 68349343-68411643; +    |
| CUST_80817_PI428753551 | 0.001   | 0.22        | seq28296-2                  | NCBI Refseq         | gi 341572586 ref NR_040533.1  | Unknown                       |
| CUST_85495_PI428753551 | 0.015   | 0.22        | seq29878-3                  | UCSC                | uc011xbo.1                    | chr10: 22273473-22371114; +   |
| CUST_80818_PI428753551 | 0.003   | 0.21        | seq28296-3                  | NCBI Refseq         | gi 341572586 ref NR_040533.1  | Unknown                       |
| CUST_16246_PI428753551 | 0.048   | 0.21        | seq5738-3                   | Fantom3.0           | ri 5330407B06 PX00053C20 4056 | Unknown                       |
| CUST_31051_PI428753551 | 0.018   | 0.21        | seq10897-2                  | Fantom3.0           | ri 9930118G10 PX00718M15 1380 | Unknown                       |
| CUST_2879_PI428753551  | 0.003   | 0.20        | seq1016-3                   | Ensembl             | ENSMUST00000150851            | chr12: 109549255-109549775; + |
| CUST_81859_PI428753551 | 0.006   | 0.20        | seq28649-1                  | NCBI Refseq         | gi 236460413 ref NR_027652.1  | Unknown                       |
| CUST_57798_PI428753551 | 0.008   | 0.20        | seq20245-3                  | Fantom3.0           | ri D030062B12 PX00699M13 1634 | chr12: 109596909-109598539; + |
| CUST_23550_PI428753551 | 0.012   | 0.19        | seq8304-1                   | Fantom3.0           | ri 7420455A22 PX00708L20 1270 | Unknown                       |
| CUST_84736_PI428753551 | 0.012   | 0.19        | seq29622-3                  | UCSC                | uc007ahc.1                    | chr1: 9968625-10009130; −     |
| CUST_51361_PI428753551 | 0.001   | 0.17        | seq18026-3                  | Fantom3.0           | ri C130039C10 PX00169A12 3280 | Unknown                       |
| CUST_72581_PI428753551 | 0.045   | 0.17        | seq25394-3                  | Fantom3.0           | ri F830012H14 PL00005I08 2807 | Unknown                       |
| CUST_27422_PI428753551 | 0.000   | 0.17        | seq9655-3                   | Fantom3.0           | ri 9430047F21 PX00109O24 3478 | Unknown                       |
| CUST_4794_PI428753551  | 0.017   | 0.16        | seq1688-1                   | Fantom3.0           | ri 1700025J06 ZX00047C01 517  | chr2: 3409046-3419041; −      |
| CUST_4796_PI428753551  | 0.000   | 0.16        | seq1688-3                   | Fantom3.0           | ri 1700025J06 ZX00047C01 517  | chr2: 3409046-3419041; −      |
| CUST_81858_PI428753551 | 0.011   | 0.16        | seq28648-3                  | NCBI Refseq         | gi 381214349 ref NR_046475.1  | Unknown                       |
| CUST_3303_PI428753551  | 0.006   | 0.16        | seq1164-2                   | Fantom3.0           | ri 1110006E14 R000013H08 1292 | chr12: 109595804-109597096; + |
| CUST_81861_PI428753551 | 0.010   | 0.15        | seq28649-3                  | NCBI Refseq         | gi 236460413 ref NR_027652.1  | Unknown                       |
| CUST_78459_PI428753551 | 0.007   | 0.15        | seq27494-3                  | NCBI Refseq         | gi 356995903 ref NR_045514.1  | Unknown                       |
| CUST_2874_PI428753551  | 0.002   | 0.15        | seq1015-1                   | Ensembl             | ENSMUST00000146701            | chr12: 109545398-109571726; + |
| A_30_P01028123         | 0.000   | 0.14        | chr9:78107225-78118850_R    | Aglient G3 8 × 60 K | Unknown                       | chr9: 78107225-78118850; −    |
| A_30_P01023273         | 0.000   | 0.14        | chr9:78107225-78118850_R    | Aglient G3 8 × 60 K | Unknown                       | chr9: 78107225-78118850; −    |

Table S1. Cont.

| Probe Name             | p-Value | Fold Change | Sequence Name               | LncRNA Source       | LncRNA Acession No-           | LncRNA Location               |
|------------------------|---------|-------------|-----------------------------|---------------------|-------------------------------|-------------------------------|
| A_30_P01020822         | 0.001   | 0.14        | chr12:110909258-110913909_F | Aglient G3 8 × 60 K | Unknown                       | chr12: 110909258-110913909; + |
| CUST_77846_PI428753551 | 0.009   | 0.14        | seq27286-2                  | lncrnadb            | Rian_NR_028261.1              | Unknown                       |
| A_30_P01020973         | 0.011   | 0.14        | chr5:106982442-107045717_R  | Aglient G3 8 × 60 K | Unknown                       | chr5: 106982442-107045717; −  |
| CUST_87021_PI428753551 | 0.013   | 0.13        | seq30396-2                  | UCSC                | uc011ysp.1                    | chr12: 109603944-109661711; + |
| CUST_16282_PI428753551 | 0.002   | 0.12        | seq5750-3                   | Fantom3.0           | ri 5330411G14 PX00643E15 1907 | chr12: 109737779-109741503; + |
| CUST_4795_PI428753551  | 0.001   | 0.12        | seq1688-2                   | Fantom3.0           | ri 1700025J06 ZX00047C01 517  | chr2: 3409046-3419041; −      |
| A_30_P01028766         | 0.002   | 0.12        | chr9:78107225-78118850_F    | Aglient G3 8 × 60 K | Unknown                       | chr9: 78107225-78118850; +    |
| A_30_P01018914         | 0.003   | 0.11        | chr9:78107225-78118850_F    | Aglient G3 8 × 60 K | Unknown                       | chr9: 78107225-78118850; +    |
| CUST_72580_PI428753551 | 0.046   | 0.11        | seq25394-2                  | Fantom3.0           | ri F830012H14 PL00005I08 2807 | Unknown                       |
| CUST_67599_PI428753551 | 0.001   | 0.10        | seq23646-3                  | Fantom3.0           | ri E130013L12 PX00207F14 4523 | Unknown                       |
| CUST_85493_PI428753551 | 0.003   | 0.07        | seq29878-1                  | UCSC                | uc011xbo.1                    | chr10: 22273473-22371114; +   |

-, antisense strand; +, sense strand.

Table S4. GO pathway categories of potential *cis/trans*-targets from significantly upregulated and downregulated lncRNAs in an NAFLD animal model.

| Category                                   | GO_Term                                                                       | p-Value                 |
|--------------------------------------------|-------------------------------------------------------------------------------|-------------------------|
| <b>Cis-targets of upregulated lncRNAs:</b> |                                                                               |                         |
| Biological Process                         | Regulation of transcription from RNA polymerase II promoter                   | 7.40 × 10 <sup>−4</sup> |
|                                            | Rhythmic process                                                              | 0.006526                |
|                                            | Fatty acid metabolic process                                                  | 0.021704                |
|                                            | Negative regulation of specific transcription from RNA polymerase II promoter | 0.025966                |
|                                            | Negative regulation of gene-specific transcription                            | 0.028406                |
|                                            | Regulation of transcription, DNA-dependent                                    | 0.029616                |
|                                            | Regulation of RNA metabolic process                                           | 0.03145                 |
|                                            | Negative regulation of transcription from RNA polymerase II promoter          | 0.03309                 |
|                                            | Circadian rhythm                                                              | 0.045322                |
| Molecular Function                         | Oxidoreductase activity                                                       | 0.010788                |

Table S4. Cont.

| Category                                     | GO_Term                                                                | p-Value               |
|----------------------------------------------|------------------------------------------------------------------------|-----------------------|
| <b>Trans-targets of upregulated lncRNAs:</b> |                                                                        |                       |
| Biological Process                           | Translation                                                            | $7.02 \times 10^{-4}$ |
|                                              | Carboxylic acid transport                                              | 0.002599              |
|                                              | Organic acid transport                                                 | 0.002767              |
|                                              | Transcription                                                          | 0.005228              |
|                                              | Response to ionizing radiation                                         | 0.005671              |
|                                              | Antigen processing and presentation of peptide antigen via MHC class I | 0.007248              |
|                                              | Apoptosis                                                              | 0.008696              |
|                                              | Antigen processing and presentation of peptide antigen                 | 0.009478              |
|                                              | Programmed cell death                                                  | 0.010298              |
|                                              | Cell death                                                             | 0.010779              |
|                                              | Regulation of transcription                                            | 0.013117              |
|                                              | Death                                                                  | 0.013817              |
|                                              | Chromosome segregation                                                 | 0.018543              |
|                                              | M phase of mitotic cell cycle                                          | 0.018583              |
|                                              | Response to radiation                                                  | 0.021978              |
|                                              | Regulation of JNK cascade                                              | 0.022394              |
|                                              | Regulation of stress-activated protein kinase signaling pathway        | 0.024077              |
|                                              | Positive regulation of protein kinase activity                         | 0.029813              |
|                                              | Mitotic cell cycle                                                     | 0.033296              |
|                                              | Regulation of cellular response to stress                              | 0.034011              |
|                                              | Positive regulation of kinase activity                                 | 0.037137              |
|                                              | Vesicle organization                                                   | 0.037478              |
|                                              | Response to abiotic stimulus                                           | 0.039562              |
|                                              | M phase                                                                | 0.040202              |
|                                              | DNA repair                                                             | 0.040945              |
|                                              | Response to DNA damage stimulus                                        | 0.043932              |
|                                              | Positive regulation of transferase activity                            | 0.044075              |
|                                              | Transmission of nerve impulse                                          | 0.045742              |

Table S4. Cont.

| Category           | GO_Term                                      | p-Value               |
|--------------------|----------------------------------------------|-----------------------|
| Cellular Component | Non-membrane-bounded organelle               | $4.56 \times 10^{-4}$ |
|                    | Intracellular non-membrane-bounded organelle | $4.56 \times 10^{-4}$ |
|                    | Condensed chromosome, centromeric region     | $5.54 \times 10^{-4}$ |
|                    | Nucleolus                                    | 0.001334              |
|                    | Chromosome, centromeric region               | 0.001389              |
|                    | Intracellular organelle lumen                | 0.002934              |
|                    | Organelle lumen                              | 0.003094              |
|                    | Kinetochore                                  | 0.003613              |
|                    | Ribonucleoprotein complex                    | 0.003792              |
|                    | Membrane-enclosed lumen                      | 0.005536              |
|                    | Mitochondrial lumen                          | 0.00595               |
|                    | Mitochondrial matrix                         | 0.00595               |
|                    | Ribosome                                     | 0.006654              |
|                    | Condensed chromosome kinetochore             | 0.008615              |
|                    | Large ribosomal subunit                      | 0.013807              |
|                    | Condensed chromosome                         | 0.014472              |
|                    | Outer kinetochore of condensed chromosome    | 0.0146                |
|                    | Mitochondrion                                | 0.015452              |
|                    | Mitochondrial ribosome                       | 0.016379              |
|                    | Organellar ribosome                          | 0.016379              |
|                    | Organellar large ribosomal subunit           | 0.016974              |
|                    | Mitochondrial large ribosomal subunit        | 0.016974              |

Table S4. Cont.

| Category                                     | GO_Term                                                                       | p-Value               |
|----------------------------------------------|-------------------------------------------------------------------------------|-----------------------|
| Molecular Function                           | Transition metal ion binding                                                  | $2.29 \times 10^{-6}$ |
|                                              | Cation binding                                                                | $1.26 \times 10^{-5}$ |
|                                              | Metal ion binding                                                             | $1.35 \times 10^{-5}$ |
|                                              | Ion binding                                                                   | $1.42 \times 10^{-5}$ |
|                                              | Zinc ion binding                                                              | $1.88 \times 10^{-4}$ |
|                                              | Structural constituent of ribosome                                            | 0.002423              |
|                                              | Cytokine receptor activity                                                    | 0.008179              |
|                                              | Cytokine binding                                                              | 0.01522               |
|                                              | Lanosterol O-acyltransferase activity                                         | 0.045087              |
|                                              | Ergosterol O-acyltransferase activity                                         | 0.045087              |
|                                              | Ribosylnicotinamide kinase activity                                           | 0.045087              |
|                                              | Sterol O-acyltransferase activity                                             | 0.045087              |
|                                              | Cholesterol O-acyltransferase activity                                        | 0.045087              |
| <b>Cis-targets of downregulated lncRNAs:</b> |                                                                               |                       |
| Biological Process                           | Regulation of transcription from RNA polymerase II promoter                   | $7.40 \times 10^{-4}$ |
|                                              | Rhythmic process                                                              | 0.006526              |
|                                              | Fatty acid metabolic process                                                  | 0.021704              |
|                                              | Negative regulation of specific transcription from RNA polymerase II promoter | 0.025966              |
|                                              | Negative regulation of gene-specific transcription                            | 0.028406              |
|                                              | Regulation of transcription, DNA-dependent                                    | 0.029616              |
|                                              | Regulation of RNA metabolic process                                           | 0.03145               |
|                                              | Negative regulation of transcription from RNA polymerase II promoter          | 0.03309               |
| Molecular Function                           | Circadian rhythm                                                              | 0.045322              |
|                                              | oxidoreductase activity                                                       | 0.010788              |

Table S4. Cont.

| Category                                       | GO_Term                                                                | p-Value               |
|------------------------------------------------|------------------------------------------------------------------------|-----------------------|
| <b>Trans-targets of downregulated lncRNAs:</b> |                                                                        |                       |
| Biological Process                             | Translation                                                            | $7.02 \times 10^{-4}$ |
|                                                | Carboxylic acid transport                                              | 0.002599              |
|                                                | Organic acid transport                                                 | 0.002767              |
|                                                | Transcription                                                          | 0.005228              |
|                                                | Response to ionizing radiation                                         | 0.005671              |
|                                                | Antigen processing and presentation of peptide antigen via MHC class I | 0.007248              |
|                                                | Apoptosis                                                              | 0.008696              |
|                                                | Antigen processing and presentation of peptide antigen                 | 0.009478              |
|                                                | Programmed cell death                                                  | 0.010298              |
|                                                | Cell death                                                             | 0.010779              |
|                                                | Regulation of transcription                                            | 0.013117              |
|                                                | Death                                                                  | 0.013817              |
|                                                | Chromosome segregation                                                 | 0.018543              |
|                                                | M phase of mitotic cell cycle                                          | 0.018583              |
|                                                | Response to radiation                                                  | 0.021978              |
|                                                | Regulation of JNK cascade                                              | 0.022394              |
|                                                | Regulation of stress-activated protein kinase signaling pathway        | 0.024077              |
|                                                | Positive regulation of protein kinase activity                         | 0.029813              |
|                                                | Mitotic cell cycle                                                     | 0.033296              |
|                                                | Regulation of cellular response to stress                              | 0.034011              |
|                                                | Positive regulation of kinase activity                                 | 0.037137              |
|                                                | Vesicle organization                                                   | 0.037478              |
|                                                | Response to abiotic stimulus                                           | 0.039562              |
|                                                | M phase                                                                | 0.040202              |
|                                                | DNA repair                                                             | 0.040945              |
|                                                | Response to DNA damage stimulus                                        | 0.043932              |
|                                                | Positive regulation of transferase activity                            | 0.044075              |



Table S4. Cont.

| Category           | GO_Term                                                                           | p-Value               |
|--------------------|-----------------------------------------------------------------------------------|-----------------------|
| Biological Process | Transmission of nerve impulse                                                     | 0.045742              |
|                    | Proton-transporting ATP synthase complex assembly                                 | 0.04741               |
|                    | Antigen processing and presentation of endogenous peptide antigen via MHC class I | 0.04741               |
|                    | Proton-transporting ATP synthase complex biogenesis                               | 0.04741               |
| Cellular Component | Non-membrane-bounded organelle                                                    | $4.56 \times 10^{-4}$ |
|                    | Intracellular non-membrane-bounded organelle                                      | $4.56 \times 10^{-4}$ |
|                    | Condensed chromosome, centromeric region                                          | $5.54 \times 10^{-4}$ |
|                    | Nucleolus                                                                         | 0.001334              |
|                    | Chromosome, centromeric region                                                    | 0.001389              |
|                    | Intracellular organelle lumen                                                     | 0.002934              |
|                    | Organelle lumen                                                                   | 0.003094              |
|                    | Kinetochore                                                                       | 0.003613              |
|                    | Ribonucleoprotein complex                                                         | 0.003792              |
|                    | Membrane-enclosed lumen                                                           | 0.005536              |
|                    | Mitochondrial lumen                                                               | 0.00595               |
|                    | Mitochondrial matrix                                                              | 0.00595               |
|                    | Ribosome                                                                          | 0.006654              |
|                    | Condensed chromosome kinetochore                                                  | 0.008615              |
|                    | Large ribosomal subunit                                                           | 0.013807              |
|                    | Condensed chromosome                                                              | 0.014472              |
|                    | Outer kinetochore of condensed chromosome                                         | 0.0146                |
|                    | Mitochondrion                                                                     | 0.015452              |
|                    | Mitochondrial ribosome                                                            | 0.016379              |
|                    | Organellar ribosome                                                               | 0.016379              |
|                    | Organellar large ribosomal subunit                                                | 0.016974              |
|                    | Mitochondrial large ribosomal subunit                                             | 0.016974              |
|                    | Ribosomal subunit                                                                 | 0.020892              |
|                    | Anchored to membrane                                                              | 0.027788              |

Table S4. Cont.

| Category           | GO_Term                                | p-Value               |
|--------------------|----------------------------------------|-----------------------|
| Molecular Function | Transition metal ion binding           | $2.29 \times 10^{-6}$ |
|                    | Cation binding                         | $1.26 \times 10^{-5}$ |
|                    | Metal ion binding                      | $1.35 \times 10^{-5}$ |
|                    | Ion binding                            | $1.42 \times 10^{-5}$ |
|                    | Zinc ion binding                       | $1.88 \times 10^{-4}$ |
|                    | Structural constituent of ribosome     | 0.002423              |
|                    | Cytokine receptor activity             | 0.008179              |
|                    | Cytokine binding                       | 0.01522               |
|                    | Lanosterol O-acyltransferase activity  | 0.045087              |
|                    | Ergosterol O-acyltransferase activity  | 0.045087              |
|                    | Ribosylnicotinamide kinase activity    | 0.045087              |
|                    | Sterol O-acyltransferase activity      | 0.045087              |
|                    | Cholesterol O-acyltransferase activity | 0.045087              |

MHC, major histocompatibility complex; J NK, Jun N-terminal kinase.

Table S5. Information of deregulated mRNAs by microarray analysis.

| Probe Name    | p-Value | Fold Change | Gene Symbol    | Gene Name                                                                   | Gene ID            |
|---------------|---------|-------------|----------------|-----------------------------------------------------------------------------|--------------------|
| A_51_P493987  | 0.001   | 52.94       | <i>Gstm1</i>   | glutathione S-transferase, mu 1                                             | NM_010358          |
| A_55_P2034531 | 0.000   | 48.48       | <i>Cyp3a59</i> | cytochrome P450, subfamily 3A, polypeptide 59                               | NM_001105160       |
| A_55_P2032081 | 0.001   | 28.51       | <i>Cyp3a11</i> | cytochrome P450, family 3, subfamily a, polypeptide 11                      | NM_007818          |
| A_55_P2032079 | 0.003   | 20.05       | <i>Bglap2</i>  | bone gamma-carboxyglutamate protein 2                                       | NM_001032298       |
| A_52_P63343   | 0.028   | 19.56       | <i>Akr1c19</i> | aldo-keto reductase family 1, member C19                                    | NM_001013785       |
| A_51_P389539  | 0.001   | 13.82       | <i>Rdh11</i>   | retinol dehydrogenase 11                                                    | NM_021557          |
| A_51_P484526  | 0.000   | 10.12       | <i>Cyp51</i>   | cytochrome P450, family 51                                                  | NM_020010          |
| A_52_P235347  | 0.007   | 9.58        | <i>Cxcl13</i>  | chemokine (C-X-C motif) ligand 13                                           | NM_018866          |
| A_51_P249286  | 0.028   | 7.88        | <i>Gstm3</i>   | glutathione S-transferase, mu 3                                             | NM_010359          |
| A_51_P397934  | 0.000   | 7.83        | <i>Pvt1</i>    | plasmacytoma variant translocation 1                                        | NR_003368          |
| A_55_P1985544 | 0.000   | 7.10        | <i>Acot6</i>   | acyl-CoA thioesterase 6                                                     | ENSMUST00000056822 |
| A_55_P2033600 | 0.000   | 6.75        | <i>Mtnr1a</i>  | melatonin receptor 1A                                                       | NM_008639          |
| A_52_P229052  | 0.000   | 6.45        | <i>Dio1</i>    | deiodinase, iodothyronine, type I                                           | NM_007860          |
| A_51_P320452  | 0.005   | 6.22        | <i>Cidea</i>   | cell death-inducing DNA fragmentation factor, alpha subunit-like effector A | NM_007702          |
| A_51_P156955  | 0.037   | 4.94        | <i>Mgll</i>    | monoglyceride lipase                                                        | NM_001166250       |

Table S5. Cont.

| Probe Name    | p-Value | Fold Change | Gene Symbol          | Gene Name                                                                                | Gene ID            |
|---------------|---------|-------------|----------------------|------------------------------------------------------------------------------------------|--------------------|
| A_66_P106611  | 0.000   | 4.51        | <i>Slc2a4</i>        | solute carrier family 2 (facilitated glucose transporter), member 4                      | NM_009204          |
| A_51_P327491  | 0.013   | 4.36        | <i>Gpr98</i>         | G protein-coupled receptor 98                                                            | NM_054053          |
| A_51_P296608  | 0.009   | 4.20        | <i>Nat8</i>          | N-acetyltransferase 8 (GCN5-related, putative)                                           | NM_023455          |
| A_55_P2293668 | 0.004   | 3.86        | <i>Sprr1a</i>        | small proline-rich protein 1A                                                            | NM_009264          |
| A_55_P2136561 | 0.013   | 3.70        | <i>Hmgcs1</i>        | 3-hydroxy-3-methylglutaryl-Coenzyme A synthase 1                                         | NM_145942          |
| A_55_P2135203 | 0.000   | 3.63        | <i>Mirg</i>          | miRNA containing gene                                                                    | AK077315           |
| A_55_P2185178 | 0.003   | 3.60        | <i>Rnf125</i>        | ring finger protein 125                                                                  | NM_026301          |
| A_55_P2121956 | 0.042   | 3.60        | <i>Dct</i>           | dopachrome tautomerase                                                                   | NM_010024          |
| A_51_P217498  | 0.049   | 3.57        | <i>Rgs16</i>         | regulator of G-protein signaling 16                                                      | NM_011267          |
| A_52_P204311  | 0.002   | 3.53        | <i>Ppp1r3g</i>       | protein phosphatase 1, regulatory (inhibitor) subunit 3G                                 | NM_029628          |
| A_51_P282760  | 0.030   | 3.50        | <i>Cyp3a41b</i>      | cytochrome P450, family 3, subfamily a, polypeptide 41B                                  | NM_001105159       |
| A_55_P2170881 | 0.001   | 3.28        | <i>Figf</i>          | c-fos induced growth factor                                                              | NM_010216          |
| A_51_P139678  | 0.003   | 3.22        | <i>Ccbp2</i>         | chemokine binding protein 2                                                              | NM_021609          |
| A_55_P2082215 | 0.000   | 3.22        | <i>Acmsd</i>         | amino carboxymuconate semialdehyde decarboxylase                                         | NM_001033041       |
| A_52_P164136  | 0.029   | 3.18        | <i>Slc13a5</i>       | solute carrier family 13 (sodium-dependent citrate transporter), member 5                | NM_001004148       |
| A_55_P2135153 | 0.012   | 3.18        | <i>Gngt1</i>         | guanine nucleotide binding protein (G protein), gamma transducing activity polypeptide 1 | NM_010314          |
| A_55_P2157093 | 0.002   | 3.15        | <i>0610010O12Rik</i> | RIKEN cDNA 0610010O12 gene                                                               | ENSMUST00000050584 |
| A_55_P2387665 | 0.002   | 3.07        | <i>Slc22a7</i>       | solute carrier family 22 (organic anion transporter), member 7                           | NM_144856          |
| A_51_P456208  | 0.011   | 3.00        | <i>Idi1</i>          | isopentenyl-diphosphate delta isomerase                                                  | NM_145360          |
| A_55_P2022074 | 0.004   | 2.96        | <i>Neu3</i>          | neuraminidase 3                                                                          | NM_016720          |
| A_51_P357735  | 0.008   | 2.94        | <i>Trem2</i>         | triggering receptor expressed on myeloid cells 2                                         | NM_031254          |
| A_51_P313581  | 0.000   | 2.90        | <i>Slc22a29</i>      | solute carrier family 22, member 29                                                      | NM_172776          |
| A_51_P387400  | 0.003   | 2.84        | <i>Aatk</i>          | apoptosis-associated tyrosine kinase                                                     | NM_007377          |
| A_55_P2042076 | 0.000   | 2.84        | <i>Bglap-rs1</i>     | bone gamma-carboxyglutamate protein, related sequence 1                                  | NM_031368          |
| A_66_P136186  | 0.048   | 2.81        | <i>Fam89a</i>        | family with sequence similarity 89, member A                                             | NM_001081120       |
| A_55_P2120919 | 0.036   | 2.80        | <i>Tef</i>           | thyrotroph embryonic factor                                                              | NM_017376          |
| A_51_P144531  | 0.033   | 2.78        |                      |                                                                                          | ENSMUST00000094754 |
| A_51_P276943  | 0.000   | 2.77        | <i>Dkk4</i>          | dickkopf homolog 4 ( <i>Xenopus laevis</i> )                                             | NM_145592          |
| A_51_P287198  | 0.005   | 2.75        |                      |                                                                                          | ENSMUST00000095071 |
| A_55_P2037787 | 0.046   | 2.74        | <i>Cabyr</i>         | calcium-binding tyrosine-(Y)-phosphorylation regulated (fibrousheathin 2)                | NM_027687          |
| A_51_P455338  | 0.001   | 2.74        | <i>Pmvk</i>          | phosphomevalonate kinase                                                                 | NM_026784          |
| A_55_P1979893 | 0.012   | 2.71        | <i>Fabp5</i>         | fatty acid binding protein 5, epidermal                                                  | NM_010634          |
| A_55_P2042156 | 0.005   | 2.67        | <i>Cd207</i>         | CD207 antigen                                                                            | NM_144943          |
| A_51_P403477  | 0.005   | 2.63        | <i>2810408I11Rik</i> | RIKEN cDNA 2810408I11 gene                                                               | NR_038009          |

Table S5. Cont.

| Probe Name    | p-Value | Fold Change | Gene Symbol      | Gene Name                                                                                          | Gene ID       |
|---------------|---------|-------------|------------------|----------------------------------------------------------------------------------------------------|---------------|
| A_51_P243755  | 0.002   | 2.63        | <i>Hunk</i>      | hormonally upregulated Neu-associated kinase                                                       | NM_015755     |
| A_66_P122086  | 0.004   | 2.62        | <i>Wee1</i>      | Wee 1 homolog 1 ( <i>Schizosaccharomyces pombe</i> )                                               | NM_009516     |
| A_55_P2039429 | 0.001   | 2.62        | <i>Serpina12</i> | serine (or cysteine) peptidase inhibitor, clade A (alpha-1 antiproteinase, antitrypsin), member 12 | NM_026535     |
| A_55_P2159934 | 0.015   | 2.60        | <i>Cyp3a11</i>   | cytochrome P450, family 3, subfamily a, polypeptide 11                                             | NM_007818     |
| A_52_P289091  | 0.004   | 2.59        | <i>Rnf186</i>    | ring finger protein 186                                                                            | NM_025786     |
| A_51_P199168  | 0.010   | 2.54        | <i>Acot1</i>     | acyl-CoA thioesterase 1                                                                            | NM_012006     |
| A_55_P2119257 | 0.041   | 2.53        | <i>Chrna4</i>    | cholinergic receptor, nicotinic, alpha polypeptide 4                                               | NM_015730     |
| A_52_P163021  | 0.001   | 2.52        | <i>Adamdec1</i>  | Adamlike, decysin 1                                                                                | NM_021475     |
| A_55_P2078830 | 0.036   | 2.51        | <i>Cyp7a1</i>    | cytochrome P450, family 7, subfamily a, polypeptide 1                                              | NM_007824     |
| A_55_P1994112 | 0.003   | 2.49        | <i>Slc13a5</i>   | solute carrier family 13 (sodium-dependent citrate transporter), member 5                          | NM_001004148  |
| A_55_P2096043 | 0.001   | 2.47        | <i>Arrdc3</i>    | arrestin domain containing 3                                                                       | NM_001042591  |
| A_55_P2083894 | 0.034   | 2.46        | <i>Dhcr7</i>     | 7-dehydrocholesterol reductase                                                                     | NM_007856     |
| A_55_P2027102 | 0.048   | 2.44        | <i>Lonrf3</i>    | Lonpeptidase N-terminal domain and ring finger 3                                                   | NM_028894     |
| A_55_P1953341 | 0.043   | 2.40        | <i>Apol7b</i>    | apolipoprotein L 7b                                                                                | NM_001024848  |
| A_51_P258493  | 0.023   | 2.39        |                  |                                                                                                    | NAP002856-002 |
| A_55_P2034067 | 0.034   | 2.39        | <i>Arhgap26</i>  | Rho GTPase activating protein 26                                                                   | NM_175164     |
| A_55_P2002557 | 0.000   | 2.38        | <i>Gstm6</i>     | glutathione S-transferase, mu 6                                                                    | NM_008184     |
| A_51_P395856  | 0.000   | 2.38        |                  |                                                                                                    |               |
| A_55_P2075263 | 0.046   | 2.37        | <i>Tbc1d30</i>   | TBC1 domain family, member 30                                                                      | NM_029057     |
| A_55_P2114863 | 0.002   | 2.35        | <i>Slc17a8</i>   | solute carrier family 17 (sodium-dependent inorganic phosphate cotransporter), member 8            | NM_182959     |
| A_55_P2063316 | 0.001   | 2.31        | <i>Atg16l2</i>   | autophagy related 16 like 2 ( <i>Saccharomyces cerevisiae</i> )                                    | NM_001111111  |
| A_55_P1963508 | 0.010   | 2.30        | <i>Cyp4a12a</i>  | cytochrome P450, family 4, subfamily a, polypeptide 12a                                            | NM_177406     |
| A_51_P346893  | 0.001   | 2.29        | <i>Prss8</i>     | protease, serine, 8 (prostasin)                                                                    | NM_133351     |
| A_55_P2165091 | 0.039   | 2.29        | <i>Rnf144a</i>   | ring finger protein 144A                                                                           | NM_080563     |
| A_55_P1986247 | 0.010   | 2.27        | <i>Atg16l2</i>   | autophagy related 16 like 2 ( <i>S. cerevisiae</i> )                                               | NM_001111111  |
| A_55_P1962937 | 0.006   | 2.25        |                  |                                                                                                    | NAP111439-1   |
| A_51_P223776  | 0.000   | 2.22        | <i>Cyp2c67</i>   | cytochrome P450, family 2, subfamily c, polypeptide 67                                             | NM_001024719  |
| A_55_P2046657 | 0.006   | 2.20        |                  |                                                                                                    |               |
| A_55_P2130885 | 0.017   | 2.17        | <i>Gpc1</i>      | glypican 1                                                                                         | NM_016696     |
| A_55_P1973844 | 0.015   | 2.12        | <i>Gm3776</i>    | predicted gene 3776                                                                                | NM_001243092  |
| A_66_P130115  | 0.030   | 2.12        | <i>Abtb2</i>     | ankyrin repeat and BTB domain containing 2                                                         | NM_178890     |
| A_66_P127161  | 0.001   | 2.11        | <i>Arntl</i>     | aryl hydrocarbon receptor nuclear translocator-like                                                | NM_007489     |
| A_55_P2054342 | 0.002   | 2.09        | <i>Grk5</i>      | G protein-coupled receptor kinase 5                                                                | NM_018869     |
| A_51_P269792  | 0.000   | 2.08        | <i>Lpl</i>       | lipoprotein lipase                                                                                 | NM_008509     |

Table S5. Cont.

| Probe Name    | p-Value | Fold Change | Gene Symbol     | Gene Name                                                                                                                                   | Gene ID      |
|---------------|---------|-------------|-----------------|---------------------------------------------------------------------------------------------------------------------------------------------|--------------|
| A_52_P315976  | 0.007   | 2.08        | <i>Fut1</i>     | fucosyltransferase 1                                                                                                                        | NM_008051    |
| A_55_P2142072 | 0.004   | 2.07        | <i>Raet1c</i>   | retinoic acid early transcript gamma                                                                                                        | NM_009018    |
| A_52_P656845  | 0.009   | 2.06        | <i>Cyp4a31</i>  | cytochrome P450, family 4, subfamily a, polypeptide 31                                                                                      | NM_001252539 |
| A_55_P2044242 | 0.002   | 2.05        | <i>Lss</i>      | lanosterol synthase                                                                                                                         | NM_146006    |
| A_55_P2063312 | 0.001   | 2.05        | <i>Cyfp2</i>    | cytoplasmic FMR1 interacting protein 2                                                                                                      | NM_001252460 |
| A_51_P272553  | 0.025   | 2.04        | <i>Ttyh1</i>    | tweety homolog 1 ( <i>Drosophila melanogaster</i> )                                                                                         | NM_021324    |
| A_66_P135391  | 0.022   | 0.50        | <i>Pdzk1ip1</i> | PDZK1 interacting protein 1                                                                                                                 | NM_001164557 |
| A_51_P386539  | 0.037   | 0.49        | <i>Cables1</i>  | CDK5 and Abl enzyme substrate 1                                                                                                             | NM_022021    |
| A_55_P2056729 | 0.029   | 0.49        | 4933437F05Rik   | RIKEN cDNA 4933437F05 gene                                                                                                                  | NM_027744    |
| A_55_P2031671 | 0.015   | 0.49        | <i>Per3</i>     | period homolog 3 ( <i>D. melanogaster</i> )                                                                                                 | NM_011067    |
| A_51_P515965  | 0.046   | 0.49        | <i>Nsdhl</i>    | NAD(P) dependent steroid dehydrogenase-like                                                                                                 | NM_010941    |
| A_66_P105422  | 0.000   | 0.49        | <i>Extl1</i>    | exostoses (multiple)-like 1                                                                                                                 | NM_019578    |
| A_55_P2072091 | 0.005   | 0.49        | <i>Raet1c</i>   | retinoic acid early transcript gamma                                                                                                        | NM_009018    |
| A_55_P2014882 | 0.007   | 0.49        | <i>Klf10</i>    | Kruppel-like factor 10                                                                                                                      | NM_013692    |
| A_52_P227937  | 0.006   | 0.49        | <i>Cyp2c68</i>  | cytochrome P450, family 2, subfamily c, polypeptide 68                                                                                      | NM_001039555 |
| A_51_P117739  | 0.000   | 0.49        | <i>Gm2814</i>   | predicted gene 2814                                                                                                                         | AK144055     |
| A_66_P100419  | 0.000   | 0.49        | <i>Ddc</i>      | dopa decarboxylase                                                                                                                          | NM_016672    |
| A_55_P2150876 | 0.004   | 0.48        | <i>Meg3</i>     | maternally expressed 3                                                                                                                      | NR_027652    |
| A_55_P2198983 | 0.004   | 0.48        | <i>Sqle</i>     | squalene epoxidase                                                                                                                          | NM_009270    |
| A_55_P2032966 | 0.005   | 0.48        | <i>Cfd</i>      | complement factor D (adipsin)                                                                                                               | NM_013459    |
| A_51_P327585  | 0.014   | 0.48        | 9130409I23Rik   | RIKEN cDNA 9130409I23 gene                                                                                                                  | NM_001033819 |
| A_52_P222073  | 0.000   | 0.48        | <i>Tmem218</i>  | transmembrane protein 218                                                                                                                   | NM_025464    |
| A_55_P2130535 | 0.022   | 0.48        | <i>Cyp4a14</i>  | cytochrome P450, family 4, subfamily a, polypeptide 14                                                                                      | NM_007822    |
| A_55_P1962661 | 0.000   | 0.48        | <i>Rgs3</i>     | regulator of G-protein signaling 3                                                                                                          | NM_134257    |
| A_55_P1966432 | 0.004   | 0.48        | <i>Als2cr12</i> | amyotrophic lateral sclerosis 2 (juvenile) chromosome region, candidate 12 (human)                                                          | NM_175370    |
| A_55_P1963692 | 0.008   | 0.48        | <i>Lpl</i>      | lipoprotein lipase                                                                                                                          | NM_008509    |
| A_51_P155196  | 0.041   | 0.47        | <i>Mgll</i>     | monoglyceride lipase                                                                                                                        | NM_001166251 |
| A_52_P63905   | 0.000   | 0.47        | <i>Trhde</i>    | TRH-degrading enzyme                                                                                                                        | NM_146241    |
| A_55_P1952399 | 0.002   | 0.47        | <i>Gm10639</i>  | predicted gene 10639                                                                                                                        | NM_001122660 |
| A_51_P479818  | 0.003   | 0.47        | <i>Cyp2b13</i>  | cytochrome P450, family 2, subfamily b, polypeptide 13                                                                                      | NM_007813    |
| A_55_P1969575 | 0.020   | 0.47        | <i>Dio1</i>     | deiodinase, iodothyronine, type I                                                                                                           | NM_007860    |
| A_51_P350048  | 0.007   | 0.47        | <i>Sema5b</i>   | sema domain, seven thrombospondin repeats (type 1 and type 1-like), transmembrane domain (TM) and short cytoplasmic domain, (semaphorin) 5B | NM_013661    |
| A_55_P2110497 | 0.005   | 0.46        | <i>Serpina5</i> | serine (or cysteine) peptidase inhibitor, clade A, member 5                                                                                 | NM_172953    |
| A_55_P1977144 | 0.000   | 0.46        | <i>Igf2bp2</i>  | insulin-like growth factor binding protein 2                                                                                                | NM_008342    |

Table S5. Cont.

| Probe Name    | p-Value | Fold Change | Gene Symbol          | Gene Name                                                   | Gene ID      |
|---------------|---------|-------------|----------------------|-------------------------------------------------------------|--------------|
| A_51_P191354  | 0.000   | 0.46        | <i>Srebf1</i>        | sterol regulatory element binding transcription factor 1    | NM_011480    |
| A_55_P2065231 | 0.015   | 0.46        | <i>Nsdhl</i>         | NAD(P) dependent steroid dehydrogenase-like                 | NM_010941    |
| A_55_P1997837 | 0.009   | 0.46        | <i>Tmprss4</i>       | transmembrane protease, serine 4                            | NM_145403    |
| A_55_P2022337 | 0.016   | 0.46        | <i>Cyp2u1</i>        | cytochrome P450, family 2, subfamily u, polypeptide 1       | NM_027816    |
| A_55_P2028961 | 0.021   | 0.46        | <i>Ear11</i>         | eosinophil-associated, ribonuclease A family, member 11     | NM_053113    |
| A_55_P2332194 | 0.028   | 0.46        | <i>Dct</i>           | dopachrome tautomerase                                      | NM_010024    |
| A_55_P1989673 | 0.000   | 0.46        | <i>Ddc</i>           | dopa decarboxylase                                          | NM_001190448 |
| A_51_P350453  | 0.030   | 0.46        |                      |                                                             | AI451831     |
| A_51_P444954  | 0.021   | 0.45        | <i>Dnmt3b</i>        | DNA methyltransferase 3B                                    | NM_001003961 |
| A_55_P2086507 | 0.029   | 0.45        | <i>Acot11</i>        | acyl-CoA thioesterase 11                                    | NM_025590    |
| A_66_P110769  | 0.010   | 0.45        | <i>Fdft1</i>         | farnesyl diphosphate farnesyl transferase 1                 | NM_010191    |
| A_51_P454196  | 0.002   | 0.45        | <i>Cyp2g1</i>        | cytochrome P450, family 2, subfamily g, polypeptide 1       | NM_013809    |
| A_55_P1985428 | 0.000   | 0.45        | <i>Mgll</i>          | monoglyceride lipase                                        | NM_001166251 |
| A_55_P2058433 | 0.000   | 0.45        | <i>Pdk4</i>          | pyruvate dehydrogenase kinase, isoenzyme 4                  | NM_013743    |
| A_55_P2012478 | 0.021   | 0.45        | <i>Dio1</i>          | deiodinase, iodothyronine, type I                           | NM_007860    |
| A_51_P142923  | 0.027   | 0.45        | <i>Bhlhe40</i>       | basic helix-loop-helix family, member e40                   | NM_011498    |
| A_55_P2161347 | 0.001   | 0.44        | <i>Slc10a2</i>       | solute carrier family 10, member 2                          | NM_011388    |
| A_55_P2033250 | 0.005   | 0.44        | <i>Bcl2l14</i>       | Bcl-like 14 (apoptosis facilitator)                         | NM_025778    |
| A_52_P84027   | 0.034   | 0.44        | <i>Ndrp1</i>         | N-myc downstream regulated gene 1                           | NM_008681    |
| A_52_P562267  | 0.001   | 0.44        | <i>Gstm2</i>         | glutathione S-transferase, mu 2                             | NM_008183    |
| A_55_P2100928 | 0.011   | 0.44        | <i>Dhrs9</i>         | dehydrogenase/reductase (SDR family) member 9               | NM_175512    |
| A_55_P2039044 | 0.014   | 0.44        | <i>Fabp2</i>         | fatty acid binding protein 2, intestinal                    | NM_007980    |
| A_55_P1956448 | 0.001   | 0.43        | <i>Cyp3a16</i>       | cytochrome P450, family 3, subfamily a, polypeptide 16      | NM_007820    |
| A_55_P2009952 | 0.022   | 0.43        | <i>Agxt2l1</i>       | alanine-glyoxylate aminotransferase 2-like 1                | NM_027907    |
| A_51_P245368  | 0.006   | 0.43        | <i>Cyp4a12b</i>      | cytochrome P450, family 4, subfamily a, polypeptide 12B     | NM_172306    |
| A_51_P247637  | 0.020   | 0.43        | <i>9130221J18Rik</i> | RIKEN cDNA 9130221J18 gene                                  | AK033690     |
| A_55_P2051254 | 0.000   | 0.43        | <i>Gm10701</i>       | predicted gene 10701                                        | AK144276     |
| A_55_P2013586 | 0.002   | 0.43        | <i>Cyp2c55</i>       | cytochrome P450, family 2, subfamily c, polypeptide 55      | NM_028089    |
| A_52_P515036  | 0.000   | 0.43        | <i>Serpine1</i>      | serine (or cysteine) peptidase inhibitor, clade E, member 1 | NM_008871    |
| A_55_P2011678 | 0.005   | 0.43        |                      |                                                             |              |
| A_55_P2038358 | 0.001   | 0.43        | <i>Acss2</i>         | acyl-CoA synthetase short-chain family member 2             | NM_019811    |
| A_55_P1961466 | 0.004   | 0.43        | <i>Gal3st1</i>       | galactose-3-O-sulfotransferase 1                            | NM_016922    |
| A_55_P2038987 | 0.001   | 0.42        | <i>Hmgcs1</i>        | 3-hydroxy-3-methylglutaryl-Coenzyme A synthase 1            | AK031297     |
| A_51_P209372  | 0.029   | 0.42        | <i>BC057022</i>      | cDNA sequence BC057022                                      | NM_001004180 |
| A_51_P331207  | 0.002   | 0.42        | <i>Wfdc2</i>         | WAP four-disulfide core domain 2                            | NM_026323    |

Table S5. Cont.

| Probe Name    | p-Value | Fold Change | Gene Symbol          | Gene Name                                                           | Gene ID            |
|---------------|---------|-------------|----------------------|---------------------------------------------------------------------|--------------------|
| A_55_P2017362 | 0.005   | 0.42        | <i>Rad5111</i>       | RAD51-like 1 ( <i>S. cerevisiae</i> )                               | NM_009014          |
| A_66_P111660  | 0.049   | 0.42        | <i>Fam89a</i>        | family with sequence similarity 89, member A                        | NM_001081120       |
| A_55_P2360266 | 0.036   | 0.42        | <i>Srgap3</i>        | SLIT-ROBO Rho GTPase activating protein 3                           | NM_080448          |
| A_52_P164161  | 0.006   | 0.42        | <i>AI132709</i>      | expressed sequence AI132709                                         | AI266897           |
| A_52_P197402  | 0.018   | 0.42        |                      |                                                                     | NAP111402-1        |
| A_55_P2019113 | 0.000   | 0.41        | <i>Slc39a4</i>       | solute carrier family 39 (zinc transporter), member 4               | NM_028064          |
| A_55_P2107070 | 0.023   | 0.41        | <i>Igfbp2</i>        | insulin-like growth factor binding protein 2                        | NM_008342          |
| A_52_P512553  | 0.001   | 0.41        | <i>Zfp618</i>        | zinc fingerprotein 618                                              | NM_028326          |
| A_51_P164296  | 0.003   | 0.41        | <i>Chka</i>          | choline kinase alpha                                                | NM_013490          |
| A_55_P2046411 | 0.017   | 0.41        | <i>Tpm2</i>          | tropomyosin 2, beta                                                 | NM_009416          |
| A_55_P1976395 | 0.013   | 0.41        | <i>Mt1</i>           | metallothionein 1                                                   | NM_013602          |
| A_51_P112223  | 0.000   | 0.41        | <i>Gas7</i>          | growth arrest specific 7                                            | NM_001109657       |
| A_52_P141488  | 0.045   | 0.41        | <i>Lcn13</i>         | lipocalin 13                                                        | NM_153558          |
| A_51_P266618  | 0.000   | 0.41        | <i>Gck</i>           | glucokinase                                                         | NM_010292          |
| A_55_P2003053 | 0.004   | 0.40        | <i>Mas1</i>          | MAS1 oncogene                                                       | NM_008552          |
| A_51_P296487  | 0.004   | 0.40        | <i>Sh2d4a</i>        | SH2 domain containing 4A                                            | NM_028182          |
| A_52_P140005  | 0.021   | 0.40        | <i>Pmck</i>          | phosphomevalonate kinase                                            | NM_026784          |
| A_55_P1954569 | 0.016   | 0.40        | <i>Aldoc</i>         | aldolase C, fructose-bisphosphate                                   | NM_009657          |
| A_51_P320852  | 0.002   | 0.40        | <i>9030619P08Rik</i> | RIKEN cDNA 9030619P08 gene                                          | NM_001039720       |
| A_55_P2007919 | 0.004   | 0.40        | <i>Inhbe</i>         | inhibin beta E                                                      | NM_008382          |
| A_55_P2177410 | 0.019   | 0.40        | <i>Nfe2</i>          | nuclear factor, erythroid derived 2                                 | NM_008685          |
| A_51_P383774  | 0.012   | 0.40        | <i>Gm10639</i>       | predicted gene 10639                                                | NM_001122660       |
| A_55_P2214124 | 0.022   | 0.39        | <i>Acnat2</i>        | acyl-coenzyme A amino acid N-acyltransferase 2                      | NM_145368          |
| A_52_P357611  | 0.005   | 0.39        | <i>Fmn2</i>          | formin 2                                                            | NM_019445          |
| A_55_P1967538 | 0.004   | 0.39        | <i>Cyp3a59</i>       | cytochrome P450, subfamily 3A, polypeptide 59                       | NM_001105160       |
| A_51_P137452  | 0.000   | 0.39        | <i>Spry4</i>         | sprouty homolog 4 ( <i>D. melanogaster</i> )                        | NM_011898          |
| A_51_P117581  | 0.003   | 0.39        | <i>Tuba8</i>         | tubulin, alpha 8                                                    | NM_017379          |
| A_55_P2171413 | 0.019   | 0.39        |                      |                                                                     |                    |
| A_55_P2143923 | 0.006   | 0.39        |                      |                                                                     | ENSMUST00000098589 |
| A_55_P2028046 | 0.000   | 0.39        | <i>Cyp8b1</i>        | cytochrome P450, family 8, subfamily b, polypeptide 1               | NM_010012          |
| A_51_P505662  | 0.001   | 0.38        | <i>Cyp4a30b-ps</i>   | cytochrome P450, family 4, subfamily a, polypeptide 30b, pseudogene | NM_001100185       |
| A_55_P1966438 | 0.039   | 0.38        | <i>1110006E14Rik</i> | RIKEN cDNA 1110006E14 gene                                          | AK141773           |
| A_51_P391616  | 0.000   | 0.38        | <i>4833411C07Rik</i> | RIKEN cDNA 4833411C07 gene                                          | BC052524           |
| A_52_P257812  | 0.002   | 0.38        | <i>Tmem28</i>        | transmembrane protein 28                                            | ENSMUST00000096363 |
| A_52_P24690   | 0.018   | 0.37        | <i>LOC100502818</i>  | uncharacterized LOC100502818                                        | XM_003084779       |

Table S5. Cont.

| Probe Name    | p-Value | Fold Change | Gene Symbol      | Gene Name                                                                 | Gene ID      |
|---------------|---------|-------------|------------------|---------------------------------------------------------------------------|--------------|
| A_55_P2140031 | 0.002   | 0.37        | <i>Acss2</i>     | acyl-CoA synthetase short-chain family member 2                           | NM_019811    |
| A_55_P1989981 | 0.001   | 0.37        | <i>Fam171b</i>   | family with sequence similarity 171, member B                             | NM_175514    |
| A_55_P2150976 | 0.014   | 0.37        | <i>Igh-VJ558</i> | immunoglobulin heavy chain (J558 family)                                  | BC019425     |
| A_55_P2070992 | 0.004   | 0.37        | <i>Gsta4</i>     | glutathione S-transferase, alpha 4                                        | NM_010357    |
| A_51_P393654  | 0.030   | 0.37        | <i>Htra4</i>     | HtrA serine peptidase 4                                                   | NM_001081187 |
| A_52_P251623  | 0.026   | 0.37        | <i>Grin3b</i>    | glutamate receptor, ionotropic, NMDA3B                                    | NM_130455    |
| A_55_P2047809 | 0.000   | 0.36        | <i>Osbp2</i>     | oxysterol binding protein 2                                               | NM_152818    |
| A_51_P405606  | 0.008   | 0.36        | <i>Snhg11</i>    | small nucleolar RNA host gene 11                                          | NM_175692    |
| A_51_P259296  | 0.001   | 0.36        | <i>Gm129</i>     | predicted gene 129                                                        | NM_001033302 |
| A_55_P2026761 | 0.014   | 0.36        | <i>Gm10804</i>   | predicted gene 10804                                                      | NR_040533    |
| A_55_P1953387 | 0.013   | 0.36        |                  |                                                                           |              |
| A_55_P2043627 | 0.003   | 0.36        | <i>Dbp</i>       | D site albumin promoter binding protein                                   | NM_016974    |
| A_55_P2122841 | 0.012   | 0.35        | <i>Gna14</i>     | guanine nucleotide binding protein, alpha 14                              | NM_008137    |
| A_55_P1966804 | 0.016   | 0.35        |                  |                                                                           |              |
| A_55_P1996702 | 0.001   | 0.35        | <i>Tmeff2</i>    | transmembrane protein with EGF-like and two follistatin-like domains 2    | NM_019790    |
| A_55_P2152607 | 0.000   | 0.35        | <i>Slco2a1</i>   | solute carrier organic anion transporter family, member 2a1               | NM_033314    |
| A_55_P2168267 | 0.018   | 0.35        | <i>Snhg11</i>    | small nucleolar RNA host gene 11                                          | NM_175692    |
| A_55_P2076533 | 0.006   | 0.34        | <i>Dbp</i>       | D site albumin promoter binding protein                                   | NM_016974    |
| A_55_P1962771 | 0.000   | 0.34        | <i>Krt23</i>     | keratin 23                                                                | NM_033373    |
| A_55_P1972322 | 0.002   | 0.34        | <i>Nipal1</i>    | NIPA-like domain containing 1                                             | NM_001081205 |
| A_55_P2043083 | 0.000   | 0.34        | <i>Asns</i>      | asparagine synthetase                                                     | NM_012055    |
| A_52_P539161  | 0.009   | 0.34        | <i>Gpr110</i>    | G protein-coupled receptor 110                                            | NM_133776    |
| A_66_P137462  | 0.018   | 0.34        | <i>Cabyr</i>     | calcium-binding tyrosine-(Y)-phosphorylation regulated (fibrousheathin 2) | NM_027687    |
| A_51_P479230  | 0.000   | 0.34        | <i>Cyp2c67</i>   | cytochrome P450, family 2, subfamily c, polypeptide 67                    | NM_001024719 |
| A_52_P207314  | 0.008   | 0.34        | <i>Gm5589</i>    | predicted gene 5589                                                       | BC080727     |
| A_55_P1988789 | 0.016   | 0.34        | <i>Lonrf3</i>    | Lonpeptidase N-terminal domain and ring finger 3                          | NM_028894    |
| A_55_P2005426 | 0.016   | 0.34        | <i>Gstm3</i>     | glutathione S-transferase, mu 3                                           | NM_010359    |
| A_51_P110381  | 0.003   | 0.33        | <i>Gadd45a</i>   | growth arrest and DNA-damage-inducible 45 alpha                           | NM_007836    |
| A_55_P1988795 | 0.007   | 0.33        |                  |                                                                           | CA492558     |
| A_55_P2099840 | 0.010   | 0.33        | <i>Sc4mol</i>    | sterol-C4-methyl oxidase-like                                             | NM_025436    |
| A_55_P2081116 | 0.003   | 0.33        | <i>Moxd1</i>     | monooxygenase, DBH-like 1                                                 | NM_021509    |
| A_51_P103222  | 0.000   | 0.32        | <i>Fdps</i>      | farnesyl diphosphate synthetase                                           | NM_001253751 |
| A_66_P121059  | 0.001   | 0.32        |                  |                                                                           | NAP114472-1  |
| A_55_P2178578 | 0.014   | 0.32        | <i>Meg3</i>      | maternally expressed 3                                                    | NR_027652    |
| A_55_P2013823 | 0.001   | 0.32        | <i>Gm15998</i>   | predicted gene 15998                                                      | XR_104847    |



Table S5. Cont.

| Probe Name    | p-Value | Fold Change | Gene Symbol     | Gene Name                                                                       | Gene ID      |
|---------------|---------|-------------|-----------------|---------------------------------------------------------------------------------|--------------|
| A_52_P566840  | 0.008   | 0.32        | <i>Acnat2</i>   | acyl-coenzyme A amino acid N-acyltransferase 2                                  | NM_145368    |
| A_51_P492410  | 0.007   | 0.32        | <i>Loxl4</i>    | lysyl oxidase-like 4                                                            | NM_001164311 |
| A_52_P2710    | 0.000   | 0.32        | <i>Fgf21</i>    | fibroblast growth factor 21                                                     | NM_020013    |
| A_51_P411345  | 0.002   | 0.31        | <i>Meig1</i>    | meiosis expressed gene 1                                                        | NM_008579    |
| A_55_P2106803 | 0.044   | 0.31        | <i>Fam129b</i>  | family with sequence similarity 129, member B                                   | NM_146119    |
| A_66_P107231  | 0.023   | 0.29        | <i>Mirg</i>     | miRNA containing gene                                                           | NR_028265    |
| A_55_P2408588 | 0.033   | 0.29        |                 |                                                                                 |              |
| A_55_P2178800 | 0.000   | 0.29        | <i>Gsta2</i>    | glutathione S-transferase, alpha 2 (Yc2)                                        | NM_008182    |
| A_66_P124179  | 0.024   | 0.28        | <i>Myom3</i>    | myomesin family, member 3                                                       | NM_001085509 |
| A_51_P238576  | 0.021   | 0.28        | <i>Ptgds</i>    | prostaglandin D2 synthase (brain)                                               | NM_008963    |
| A_55_P2121225 | 0.000   | 0.26        | <i>Wif1</i>     | Wnt inhibitory factor 1                                                         | NM_011915    |
| A_55_P1975185 | 0.013   | 0.26        | <i>Raet1e</i>   | retinoic acid early transcript 1E                                               | NM_198193    |
| A_55_P1957918 | 0.007   | 0.25        | <i>Stap1</i>    | signal transducing adaptor family member 1                                      | NM_019992    |
| A_51_P267933  | 0.000   | 0.25        | <i>Btg3</i>     | B cell translocation gene 3                                                     | NM_009770    |
| A_55_P2046408 | 0.003   | 0.24        | <i>Ttk1</i>     | tau tubulin kinase 1                                                            | NM_001162864 |
| A_55_P2115955 | 0.019   | 0.23        | <i>Fam19a2</i>  | family with sequence similarity 19, member A2                                   | NM_182807    |
| A_51_P355301  | 0.000   | 0.22        | <i>Tff3</i>     | trefoil factor 3, intestinal                                                    | NM_011575    |
| A_55_P2148071 | 0.000   | 0.22        | <i>Gstm4</i>    | glutathione S-transferase, mu 4                                                 | NM_026764    |
| A_51_P482051  | 0.000   | 0.22        | <i>Gsth2</i>    | glutathione S-transferase, theta 2                                              | NM_010361    |
| A_51_P268529  | 0.003   | 0.21        | <i>Atp6v0d2</i> | ATPase, H <sup>+</sup> transporting, lysosomal V0 subunit D2                    | NM_175406    |
| A_55_P1959748 | 0.013   | 0.20        |                 |                                                                                 | AK038006     |
| A_66_P106148  | 0.010   | 0.18        | <i>Cd9</i>      | CD9 antigen                                                                     | NM_007657    |
| A_55_P2001780 | 0.000   | 0.18        | <i>Grm8</i>     | glutamate receptor, metabotropic 8                                              | NM_008174    |
| A_51_P447785  | 0.000   | 0.17        | <i>Per2</i>     | period homolog 2 ( <i>D. melanogaster</i> )                                     | NM_011066    |
| A_51_P378789  | 0.000   | 0.17        | <i>Fam129b</i>  | family with sequence similarity 129, member B                                   | NM_146119    |
| A_51_P469951  | 0.001   | 0.16        | <i>Nr1d1</i>    | nuclear receptor subfamily 1, group D, member 1                                 | NM_145434    |
| A_55_P2164075 | 0.003   | 0.16        | <i>Slc13a2</i>  | solute carrier family 13 (sodium-dependent dicarboxylate transporter), member 2 | NM_022411    |
| A_55_P2102060 | 0.006   | 0.16        | <i>Htatip2</i>  | HIV-1 tat interactive protein 2, homolog (human)                                | NM_016865    |
| A_55_P2033407 | 0.008   | 0.16        | <i>Apoa4</i>    | apolipoprotein A-IV                                                             | NM_007468    |
| A_52_P350750  | 0.046   | 0.15        | <i>Mogat2</i>   | monoacylglycerol O-acyltransferase 2                                            | NM_177448    |
| A_55_P2170454 | 0.001   | 0.15        | <i>BC068157</i> | cDNA sequence BC068157                                                          | NM_207203    |
| A_51_P155873  | 0.035   | 0.14        | <i>Cml5</i>     | camello-like 5                                                                  | NM_023493    |
| A_51_P455997  | 0.007   | 0.14        | <i>Fads2</i>    | fatty acid desaturase 2                                                         | NM_019699    |
| A_55_P2102065 | 0.001   | 0.14        | <i>Synj2</i>    | synaptojanin 2                                                                  | NM_011523    |
| A_55_P2069969 | 0.000   | 0.13        | <i>Meig1</i>    | meiosis expressed gene 1                                                        | NM_008579    |

Table S5. Cont.

| Probe Name    | p-Value | Fold Change | Gene Symbol          | Gene Name                                                                                                                                   | Gene ID      |
|---------------|---------|-------------|----------------------|---------------------------------------------------------------------------------------------------------------------------------------------|--------------|
| A_55_P2336173 | 0.003   | 0.13        | <i>Me1</i>           | malic enzyme 1, NADP(+)-dependent, cytosolic                                                                                                | NM_001198933 |
| A_55_P1962516 | 0.005   | 0.13        | <i>4930415C11Rik</i> | RIKEN cDNA 4930415C11 gene                                                                                                                  | AI606402     |
| A_55_P2093705 | 0.000   | 0.13        | <i>Csad</i>          | cysteine sulfinic acid decarboxylase                                                                                                        | NM_144942    |
| A_55_P2093704 | 0.001   | 0.13        | <i>Asap2</i>         | ArfGAP with SH3 domain, ankyrin repeat and PH domain 2                                                                                      | NM_001135192 |
| A_66_P119518  | 0.000   | 0.12        | <i>Me1</i>           | malic enzyme 1, NADP(+)-dependent, cytosolic                                                                                                | NM_001198933 |
| A_55_P2032946 | 0.001   | 0.12        | <i>Abcb1b</i>        | ATP-binding cassette, sub-family B (MDR/TAP), member 1B                                                                                     | NM_011075    |
| A_55_P2058550 | 0.007   | 0.11        | <i>Sema5b</i>        | sema domain, seven thrombospondin repeats (type 1 and type 1-like), transmembrane domain (TM) and short cytoplasmic domain, (semaphorin) 5B | NM_013661    |
| A_55_P2017116 | 0.009   | 0.11        | <i>Ugt1a10</i>       | UDP glycosyltransferase 1 family, polypeptide A10                                                                                           | NM_201641    |
| A_55_P2419299 | 0.002   | 0.08        | <i>Kcnk10</i>        | potassium channel, subfamily K, member 10                                                                                                   | NM_029911    |

BTB, broad-complex, tramtrack, and bric-à-brac; FMR, fragile X mental retardation; PDZK, PDZ-containing kidney protein; TRH, thyrotropin releasing hormone; WAP, whey acidic protein; EGF, epidermal growth factor; NIPA, nuclear interaction partner of anaplastic lymphoma receptor tyrosine kinase; DBH, dopamine  $\beta$ -hydroxylase

**Table S6.** GO pathway categories of potential *cis/trans*-targets from significantly upregulated and downregulated lncRNAs in an NAFLD animal model.

| Category                  | GO_Term                                          | p-Value                |
|---------------------------|--------------------------------------------------|------------------------|
| <b>Upregulated mRNAs:</b> |                                                  |                        |
| Biological Process        | Oxidation reduction                              | $1.40 \times 10^{-11}$ |
|                           | Sterol biosynthetic process                      | $2.15 \times 10^{-8}$  |
|                           | Lipid biosynthetic process                       | $5.70 \times 10^{-8}$  |
|                           | Cholesterol biosynthetic process                 | $1.11 \times 10^{-8}$  |
|                           | Sterol metabolic process                         | $1.15 \times 10^{-7}$  |
|                           | Cholesterol metabolic process                    | $7.10 \times 10^{-7}$  |
|                           | Steroid biosynthetic process                     | $7.93 \times 10^{-11}$ |
|                           | Steroid metabolic process                        | $1.11 \times 10^{-6}$  |
|                           | Circadian rhythm                                 | $2.26 \times 10^{-6}$  |
|                           | Rhythmic process                                 | $8.03 \times 10^{-5}$  |
|                           | Isoprenoid biosynthetic process                  | 0.001549               |
|                           | Isoprenoid metabolic process                     | 0.001771               |
|                           | Fatty acid metabolic process                     | 0.003451               |
|                           | Secondary metabolic process                      | 0.006139               |
|                           | Organic anion transport                          | 0.00806                |
|                           | Cellular amino acid derivative metabolic process | 0.017095               |
|                           | Carboxylic acid biosynthetic process             | 0.017095               |
|                           | Organic acid biosynthetic process                | 0.017095               |
|                           | Coenzyme metabolic process                       | 0.018058               |
| Cellular Component        | Microsome                                        | $1.09 \times 10^{-12}$ |
|                           | Vesicular fraction                               | $1.89 \times 10^{-12}$ |
|                           | Endoplasmic reticulum                            | $2.58 \times 10^{-8}$  |
|                           | Cell fraction                                    | $6.03 \times 10^{-8}$  |
|                           | Membrane fraction                                | $9.84 \times 10^{-8}$  |
|                           | Insoluble fraction                               | $1.73 \times 10^{-7}$  |
|                           | Extrinsic to membrane                            | $5.42 \times 10^{-5}$  |
|                           | Extracellular region                             | 0.005526               |

Table S6. Cont.

| Category           | GO_Term                                                                     | p-Value                |
|--------------------|-----------------------------------------------------------------------------|------------------------|
| Molecular Function | Heme binding                                                                | $7.60 \times 10^{-12}$ |
|                    | Tetrapyrrole binding                                                        | $1.58 \times 10^{-11}$ |
|                    | Glutathione transferase activity                                            | $3.20 \times 10^{-10}$ |
|                    | Oxidoreductase activity                                                     | $1.33 \times 10^{-9}$  |
|                    | Transferase activity, transferring alkyl or aryl (other than methyl) groups | $7.63 \times 10^{-9}$  |
|                    | Electron carrier activity                                                   | $1.02 \times 10^{-8}$  |
|                    | Aromatase activity                                                          | $9.26 \times 10^{-8}$  |
|                    | Iron ion binding                                                            | $3.91 \times 10^{-7}$  |
|                    | Acyl-CoA thioesterase activity                                              | 0.021581               |
|                    | CoA hydrolase activity                                                      | 0.032835               |
|                    | Carboxylesterase activity                                                   | 0.035344               |
|                    | Carboxy-lyase activity                                                      | 0.037853               |

Table S6. Cont.

| Category                    | GO_Term                                          | p-Value                |
|-----------------------------|--------------------------------------------------|------------------------|
| <b>Downregulated mRNAs:</b> |                                                  |                        |
| Biological Process          | Oxidation reduction                              | $3.96 \times 10^{-12}$ |
|                             | Sterol biosynthetic process                      | $1.25 \times 10^{-9}$  |
|                             | Lipid biosynthetic process                       | $1.32 \times 10^{-9}$  |
|                             | Cholesterol biosynthetic process                 | $9.73 \times 10^{-9}$  |
|                             | Steroid biosynthetic process                     | $3.41 \times 10^{-8}$  |
|                             | Sterol metabolic process                         | $6.51 \times 10^{-8}$  |
|                             | Steroid metabolic process                        | $1.94 \times 10^{-7}$  |
|                             | Cholesterol metabolic process                    | $5.87 \times 10^{-7}$  |
|                             | Isoprenoid metabolic process                     | $3.89 \times 10^{-4}$  |
|                             | Isoprenoid biosynthetic process                  | $4.77 \times 10^{-4}$  |
|                             | Secondary metabolic process                      | 0.012791               |
|                             | Carboxylic acid biosynthetic process             | 0.017699               |
|                             | Organic acid biosynthetic process                | 0.017699               |
|                             | Cellular amino acid derivative metabolic process | 0.017699               |
|                             | Terpenoid metabolic process                      | 0.017718               |
|                             | Fatty acid metabolic process                     | 0.04134                |
|                             | Benzene and derivative metabolic process         | 0.041656               |
|                             | Acetyl-CoA biosynthetic process                  | 0.041656               |
| Cellular Component          | Phosphatidylcholine biosynthetic process         | 0.04843                |
|                             | Cellular zinc ion homeostasis                    | 0.04843                |
|                             | Microsome                                        | $2.77 \times 10^{-12}$ |
|                             | Vesicular fraction                               | $4.38 \times 10^{-12}$ |
|                             | Endoplasmic reticulum                            | $1.92 \times 10^{-8}$  |
|                             | Membrane fraction                                | $4.00 \times 10^{-7}$  |
|                             | Cell fraction                                    | $5.28 \times 10^{-7}$  |
|                             | Insoluble fraction                               | $6.22 \times 10^{-7}$  |
|                             | Extrinsic to membrane                            | $2.87 \times 10^{-5}$  |

Table S6. Cont.

| Category           | GO_Term                                                                     | p-Value                |
|--------------------|-----------------------------------------------------------------------------|------------------------|
| Molecular Function | Glutathione transferase activity                                            | $9.96 \times 10^{-12}$ |
|                    | Heme binding                                                                | $4.58 \times 10^{-11}$ |
|                    | Tetrapyrrole binding                                                        | $8.36 \times 10^{-11}$ |
|                    | Transferase activity, transferring alkyl or aryl (other than methyl) groups | $1.65 \times 10^{-10}$ |
|                    | Electron carrier activity                                                   | $3.09 \times 10^{-12}$ |
|                    | Oxidoreductase activity                                                     | $3.14 \times 10^{-8}$  |
|                    | Aromatase activity                                                          | $1.67 \times 10^{-7}$  |
|                    | Iron ion binding                                                            | $2.34 \times 10^{-7}$  |
|                    | Carboxy-lyase activity                                                      | 0.017087               |
|                    | Intramolecular oxidoreductase activity                                      | 0.032464               |
|                    | Alcohol dehydrogenase (NAD) activity                                        | 0.043886               |

Table S7. Primers of the genes selected for qPCR analysis.

| Name         | Description/Probe Name                              | GenBank/Location | Primer Sequence (5'–3')                                    |
|--------------|-----------------------------------------------------|------------------|------------------------------------------------------------|
| <b>mRNA:</b> |                                                     |                  |                                                            |
| <i>Arntl</i> | Aryl hydrocarbon receptor nuclear translocator-like | NM_007489        | F: TCATGAGCCTCTTGAAGCA<br>R: GGCCATGGCAAGTCACTAAAG         |
| <i>Per2</i>  | Pperiod homolog 2 ( <i>D. melanogaster</i> )        | NM_011066        | F: TGCTGGTCCTCAGATCACTG<br>R: TAGAGCTGGGCAGAGAGGTC         |
| <i>Per3</i>  | Period homolog 3 ( <i>D. melanogaster</i> )         | NM_011067        | F: CTTTTCACCAAACGACACGA<br>R: CTCATGGGACTCTGCTGTCA         |
| <i>Nr1d1</i> | Nuclear receptor subfamily 1, group D, member 1     | NM_145434        | F: CCCAACGACAACAACCTTTT<br>R: GTGCCCATTGCTGTAGGTT          |
| <i>Fads2</i> | Fatty acid desaturase 2                             | NM_019699        | F: CCTTTGTCCTCGCTACCTCTCA<br>R: ATAGACAGAAAGGTGGCCATAGTCA  |
| <i>Lpl</i>   | Lipoprotein lipase                                  | NM_008509        | F: GGTATCTGAACACCAACCCACAT<br>R: TATCCCTTGACTCTTTCCTTTCTGA |
| <i>Fabp5</i> | Fatty acid binding protein 5, epidermal             | NM_010634        | F: TGTCATGAACAATGCCACCT<br>R: CTGGCAGCTAACTCCTGTCC         |

Table S7. Cont.

| Name           | Description/Probe Name                                  | GenBank/Location              | Primer Sequence (5'–3')                                    |
|----------------|---------------------------------------------------------|-------------------------------|------------------------------------------------------------|
| <i>Asap2</i>   | Arf GAP with SH3 domain, ankyrin repeat and PH domain 2 | NM_001135192                  | F: ACGCATCTGTATCATCGGTCTTAG<br>R: GGGACTGGAGTTAAAATGTTGACA |
| <i>Acmsd</i>   | Amino carboxymuconate semialdehyde decarboxylase        | NM_001033041                  | F: CCTGAGTCTGGAAGGATGGA<br>R: GCCTCAAACACAGACCCATT         |
| <i>Actin</i>   | Beta-actin                                              | NM_007392                     | F: TGGCTCCTAGCACCATGAAGA<br>R: GCCACCGATCCACACAGAGT        |
| <b>lncRNA:</b> |                                                         |                               |                                                            |
| <i>FLRL1</i>   | CUST_16222_PI428753551                                  | chr4(151033075, 151036561, −) | F: CCCATCTCTGTTGGTGACCT<br>R: CGGCAAACCTCAACCATTCTT        |
| <i>FLRL2</i>   | CUST_39241_PI42875355                                   | chr7(113240249, 113243748, +) | F: TGGTGTGTGTGAGCCTGAGAA<br>R: AGCAGCAAGTAATAGGATGAGCAA    |
| <i>FLRL3</i>   | CUST_56439_PI428753551                                  | chr4(11611139, 11615007, −)   | F: CTGGAGGGAAGACGATCGAA<br>R: TGCGAGCTGGTTCTGTAACTT        |
| <i>FLRL4</i>   | CUST_6576_PI428753551                                   | chr12(21269099, 21270170, +)  | F: CACGCATCTGTATCATCGGTCTT<br>R: GGGACTGGAGTTAAAATGTTGACA  |
| <i>FLRL5</i>   | CUST_69671_PI428753551                                  | chr9(46239840, 46242032, −)   | F: GGCCACCTGGTCCGAAGT<br>R: CATAAAGTTGCCTTCTGCTCTCTCT      |
| <i>FLRL6</i>   | CUST_84985_PI42875355                                   | chr1(91415981, 91459328, −)   | F: CAGAGTTTGTGCGATGATGATTC<br>R: CTGGGTGAAGGTACGTTTGTT     |
| <i>FLRL7</i>   | CUST_89632_PI428753551                                  | chr19(10063631, 10064017, −)  | F: ATGGCTGGGATTGGTACTTG<br>R: ATGGTGGGCATGAGAGAACT         |
| <i>FLRL8</i>   | CUST_94177_PI428753551                                  | chr8(84001705, 84004770, +)   | F: GACCAGCAGAGGATGATCTTGACT<br>R: TTGCCCTCCCTCGAACTTAA     |
